# Supplementary material
Source: PubMed Central journal article supplement (PMC4026164)

## Supplementary Appendix

This appendix has been provided by the authors to give readers additional information about their work.

Supplement to: The ACCORD Study Group and ACCORD Eye Study Group. Effects of medical therapies on retinopathy progression in type 2 diabetes. *N Engl J Med* 2010;363:233-44. DOI: 10.1056/NEJMoa1001288.

## Table of Contents

| <b>Section</b> | <b>Title</b>                                                                                                           | <b>Page</b> |
|----------------|------------------------------------------------------------------------------------------------------------------------|-------------|
| 1              | The ACCORD Study Group . . . . .                                                                                       | 2           |
| 2              | The ACCORD Eye Substudy Group . . . . .                                                                                | 11          |
| 3              | Description of ETDRS grading scale . . . . .                                                                           | 13          |
| 4              | ACCORD Eye CONSORT diagram . . . . .                                                                                   | 16          |
| 5              | Baseline characteristics of ACCORD Eye participants with and without follow-up and rest of ACCORD main trial . . . . . | 17          |
| 6              | Longitudinal Plots of A1c, HDL, triglycerides, and systolic BP . . . . .                                               | 18          |
| 7              | Additional ACCORD Eye analyses . . . . .                                                                               | 20          |
| 8              | ACCORD design and details of allocation to blood pressure and lipid Trials . . . . .                                   | 22          |
| 9              | ACCORD Eye Study design and details of eligibility criteria . . . . .                                                  | 23          |
| 10             | Longitudinal Plots of A1c, HDL, triglycerides, and systolic BP in large format . . . . .                               | 24          |
| 11             | Subgroup analyses (forest plots) in large format . . . . .                                                             | 29          |

## Section 1. The Action to Control Cardiovascular Risk in Diabetes (ACCORD) Study Group

Steering Committee: W.T. Friedewald (Chair), J.B. Buse (Vice Chair), J.T. Bigger, R.P. Byington, W.C. Cushman, F. Ismail-Beigi, H. C. Gerstein, H. N. Ginsberg, D.C. Goff, Jr, R.H. Grimm, Jr, J.L. Probstfield, D.G. Simons-Morton.

Clinical center networks (CCNs) and clinical sites:

Canadian CCN: Population Health Research Institute, Hamilton General Hospital, Canadian Diabetes Outcome Researchers (CANDOR Network), Hamilton, Ontario, Canada:

H.C. Gerstein, S. Yusuf, Z. Punthakee, R. Russo, S. Anand, K Chrysler\*, B. Cracknell, T. Cukierman-Yaffe, A. Gafni, G. Guyatt\*, S. Hall, J. Kaszyca, E. Lonn\*, P. Mackie\*, V. Reidling, N. Shehadeh\*, B. Tadeson\*, K. Thompson\*, M. Vallis, V. Vasudeva, I. Wilderman\*, D. Wright

Canadian clinical sites:

McMaster Medical Centre, Hamilton, Ontario, Canada: Z. Punthakee, A. Smith, I. Stanton, S. Capes\*, P. Manjoo\*, T. Valla, S. Danby\*, W. Harper\*, P. Harvey, D. Hunt, Audrey Moroso\*, Rose Otto, Ally Prebtani.

Six Nations Health Services, Ohsweken, Ontario, Canada: Z. Punthakee, A. Davis, S. Capes\*, K.L. Hill, V. McCarthy.

Diabetes, Hypertension and Cholesterol Centre, University of Calgary, Calgary, Alberta, Canada: A.L. Edwards, D.J. Mitchell, M.A. Clearwaters, C. Dielissen\*, M. Gillam, B. Hammond\*, H. Jensen\*, A. Kherani\*, D. Lau, V. Pringle, D. Rabi, R. Sigal, C. Smith\*, M. Walker\*, G. Williams\*.

Memorial University of Newfoundland, St. John's, Newfoundland, Canada: C. Joyce, M. Parsons, B. Rowe, J. Burton\*, V. Chandurkar, S. Coady McDonald\*, D. Gibbons\*, C. Kovacs, B. Murphy\*, R. Smart\*, S. Varghese.

University of Alberta, Edmonton, Alberta, Canada: L. Mereu, E. Ryan, P. Senior, P. Kirkland, J. Abe\*, K. Dalton, W. Gendall, J. Germsheid\*, D. Hartmann\*, A. Jeffrys\*, U. Kumar\*, C. MacDonald, N. Makhani, S. Mawani\*, F. Morales, B. Paty\*, M. Pick\*, B. Schwanke, A. Stark, M. Tennant, S. Varma\*, D. Weiss-Aburto, P. WerbiskiWood, B. Woloschuk, W. Zimmerman\*.

Centre de Recherche Clinique de Laval, Laval, Quebec, Canada: A. Bélanger, S. Gauthier, G. Bahsali\*, C. Barbeau\*, E. Caponi\*, R. Duchesne\*, R. Dumas, P. Gauthier, J. Girouard\*, N. Kandalaft\*, M. Labbé, J. Palardy, M. Pilon, J. Raymond, A. Schiffrin.

St. Joseph's Health Care London, London, Ontario, Canada: I. Hramiak, S. Tereschyn, M. Driscoll, M. Gehring, J. Gonder, C. Lincoln, W. McBeth, C. McDonald, T. McDonald\*, P. Pauli\*, T. Paul, S. Powers\*, N. Ronald, V. Trinh\*, L. Vancer\*, G. Walsh\*.

Ottawa Hospital, Division of Endocrinology and Metabolism, Ottawa, Ontario, Canada: H. Lochnan, T.C. Ooi, J. Maranger, L. Bradley\*, R. Buhrmann, M. Cyr\*, C. Gilchrist\*, B. Hanlon\*, M. Harley\*, K. Jay\*, T. Leech, J. Malcolm, M. McLean\*, E. Parker\*, R. Sigal\*, K. Sullivan.

Royal Victoria Hospital, Montreal, Quebec, Canada: J.F. Yale, S.A. Segal, G. Al Ansari, N. Renouf\*, N. Allaire\*, M.A.M.A. Alawadhi\*, B. Belfer\*, D.W. Blank, F. Bouchard\*, S. Buoy Phang\*, J. Carter, L. Coppin\*, D. Dalpe\*, I. Delpech\*, P.M. Doran†, F. Emmian\*, S. Fortin\*, N. Garfield, M. Gosselin\*, S. Horan\*, M. Kalergis\*, S. Koutelias\*, C. Légaré\*, A. Lombardo\*, J.A. Morais, M. Quigley\*, N. Renouf\*, C. Riopel\*, S. Riopel, J.A. Rivera, G. Rochon\*, M. Roy, M. Salera\*, M.H. Sherman, M. Shingler\*, H.E. Staples\*, L. Ulyatt\*, Z. Yared\*.

St. Michael's Hospital, Toronto, Ontario, Canada: L.A. Leiter, G. Booth, L. Sparrow\*, H. Choi, D.C. Bedard, A. Berger\*, L.A. Berndl, A. Cheng\*, V. Evalmplev\*, J. Goguen, A. Hanna, R.G. Josse, J.A. Kalas\*, S. Perry, M. Pike\*.

Vancouver General Hospital, Vancouver, British Columbia, Canada: T. Elliott, K. Dawson, J. Kong, D. Albiani\*, M. Inducil, R. Al Amoudi\*, T. Broughton\*, L. Hall\*, B. Harrison\*, N. Hirvi\*, R. Lee\*, A. Merkur\*, E. Norman\*, B. Paty, M. Potter, D. Stevenson\*, A. Vafadaran.

Health Sciences Centre Diabetes Research Group, Winnipeg, Manitoba, Canada: V. Woo, L. Berard, T. Anderlic, K. Austman\*, A. Bernard\*, D. Catte\*, P. Darvill\*, D. Hak, K. Hutchison\*, L. Janzen\*, T. Klopak, C. Mandock, M. Mathen\*, S. Mawani\*, A. Mawani\*, L. Murphy†, G. Nyomba, B. Penner\*, S. Pockett\*, S. Russell\*, F. Stockl, J. Studney\*, R. Sukkau.

Queen Elizabeth II Health Sciences Centre, Halifax, Nova Scotia, Canada: C. Abbott, E. Ur\*, M. Yuille, M. Archibald\*, D. Clayton, A. Cruess, N. Davis, H. Fong\*, S. Frizzell\*, B. Hanway\*, A. Hoskin-Mott, A. Imran, C. Ingraham\*, G. McCarthy, H. Murdock\*, T. Palmer, A.M. Patterson\*, T. Ransom, D. Shu\*, J. Tuttle\*.

Western CCN: University of Washington, Seattle, WA: J.L. Probstfield, C. Kingry, A.S. Line, M.A. Corson, R. Knopp\*, E. Lipkin\*, M.D. Sullivan, J. Johnson, C. Griswold\*, K. Liebert\*, A. Brown\*, D. Juliano\*, E.M. Kurashige\*, S. Moberg\*, J. Leader

Western clinical sites:

Northridge Hospital Medical Center, Cardiovascular Center, Northridge, CA: K. Ariani, K. Karunaratne, M. Azizad\*, C. Chow\*, H. Gutierrez, J. Partamian\*, J. Toven\*, J. Toven, J. Mular\*, S. Sanders\*

White Memorial Medical Center, Clinical Hypertension Services, Los Angeles, CA: L.J. Haywood, V. Kamdar\*, D.L. DeQuattro, L. Wang, Z. Song, L. Becerra, A. Qi Cai\*, C. Pruitt\*, V. DeQuattro†

University of Washington Medical Center at Roosevelt, Family Medical Center, Seattle, WA: R. Failor, A. Ellsworth\*, N. Jackson, C. Miller, D. Britt\*, S. Dobie\*, I. Hirsch\*, D. Khakpour\*, R. Quaempts\*, W. Stoffel\*, W. Neighbor\*, K. Cappocia\*, V.Hawkins\*, L.Tapp

Idaho State University, Department of Family Medicine, Pocatello, ID: R. Force, M. Macdonald, K. Pettingill, C. Liday\*, S. Koester\*, T. Pettinger, R. Solbrig, C. Waldron,\* W. Woodhouse\*, B. Hoover\* S.Lusk, T. Wilcox\*, D.Hachey\*

Naval Medical Center San Diego, Cardiology Division, San Diego, CA: P.E. Linz, P.V. Pepper, J. Kozlowski, C. Chase\*, C. Griffin, D. Samuelson\*, P. Gutierrez\*, C. Gonzales, M. Engle\*, J. Coopersmith\*, S. Griffin, R. Lammers\*, J. Leon\*, D. Zirkle\*, S. Hollingsworth\*

Oregon Health & Science University, Section of Diabetes, Portland, OR: M.C. Riddle, K.A. Hanavan, P.A. McDaniel, R. Swift, A.J. Ahmann\*, S.C. Gammell-Matthews, D.M. Karl, V. Burden\*, B. MacNeil, M. MacMurray, J. Weiss\*, C. Carlson\*, S.K. DesRochers\*, D. Negreanu\*, E.A. Stephens\*, D. Gale\*

Washington State University, Spokane, WA: C. Wysham, D. Weeks, L. Kuntsmann, L. Maxwell\*, S. Yedinak, H. Pena\*, J. Kistler\*, J. White\*

Kaiser Endocrine Clinic, San Diego, CA: J. Dudl, L. Lyons, B. House, M. Murray, R. Stevenson\*, P. Wu\*, A. Palma\*, S. Briere\*, T. Wilson\*, D. Becker\*, K. Harden\*, C. Hawley\*

Whittier Institute for Diabetes, Clinical Trials Department, La Jolla, CA: G. Dailey, M. Baron, A. Gianella, M. Jacobson\*, E. Farro\*, A. Philis-Tsimikas\*, A. Banares\*, A. Bravo-Medina\*, J. Horne\*, E. Esquer\*, R. Morrissey\*

Minnesota-Iowa CCN: Berman Center for Outcomes & Clinical Research, Minneapolis, MN: R.H. Grimm, Jr, B.R. Kirpach, M.M. Bartkoske, C.M. Boyce\*, N. Druckman\*, A.M. Gillett\*, J.A. Levin, G.J. Livingston, A.M. Murray, H. Wood\*, HealthPartners Research Foundation, Minneapolis, MN: K.L. Margolis.

Minnesota-Iowa clinical sites:

Hennepin ACCORD Clinic, Minneapolis, MN: S. Kempainen, M. Madden, M.Tariq Fareed\*, K. Hall\*, R. Moor\*, K.Wood.

International Diabetes Center, Minneapolis, MN: R. Bergenstal, R. Cuddihy, B. Davick\*, J. Hokanson\*, M. Johnson, M. Lausch\*, S. List, A. Monk, R. Robinson\*, K. Smith\*, D. Whipple, G. Damberg, R. Hahn\*, V. Koenig\*, M. Magadan, S. Sabin- Smith\*, P. Stewart\*, E. Strock, D. Peremislov, K. Gunyou, R. Passi . C. Ashanti, L. Thomas, D. Stoffels.

University of Minnesota, Minneapolis, MN: E.R. Seaquist, M.V. Mech, L.E. Benedict\*, D.J. Demmon\*, D. Kendall\*, A.F. Kumar\*, S.M. Martinson\*, S.A. Miller\*, C. Pease\*, J.P. Rao\*, J.B. Redmon\*, J.E. Swanson†, J.K. Wimmer\*, Y. Okorochoa, M. Stiles\*, C. Kodl\*, C. Chadha\*

University of Minnesota, Phalen Village Clinic, St. Paul, MN: KA.. Peterson, L.A. Seaquist, C. Boese\*, M. Cruciani\*, E. Dodds, F. Parenteau Ek\*, J.L. Feldman\*, P. Fontaine\*, C.J. Lange, T.J. Mendenhall\*, A.M. Peterson\*, A. Rudelt\* T.M. Schrock\*, D.P. Spielman\*, S. Velasco\*, J.C. Weinhand\*.

Riverside Health Partners Clinic, Department of Endocrinology, Minneapolis, MN: J.M. Sperl-Hillen, P.J. O'Connor, M.E. Busch, A. Chung\*, B.K. Klein\*, N. Krugen\*, T. Bunkers-Lawson\*, H.L. Ekstrom\*, H.S. Gunderson\*, B.M. Johnson\*, J.H. MacIndoe\*, D.J. Prewedo\*, J.L. Rawl\*, C.M. Roethke\*, Mary Quinlan, C.R. Fox, B.M. Bate, Q.T. Cao\*. M.M. Ohnstad, P.J. Meyers\*.

University of Iowa, Health Care Diabetes Clinical Research and Programs, Iowa City, IA: W.I. Sivitz, S.M. Wayson, T.A. Lower\*, L. Larson, L.A. Ahrens\*, M. Bayless, S.E. Beck\*, J. Chahal, C. Chenard, G.C. Doelle, V.M. Guzman, U.M. Kabadi\*, K.A. Ochs\*, A. Rahhal, R.G. Spanheimer\*, L. Snetselaar\*, K. Smith\*, D. Wells\*.

Ohio-Michigan CCN: Case Western Reserve University, Division of Clinical and Molecular Endocrinology, Cleveland, OH: S. Genuth, F. Ismail-Beigi, M. Thibonnier\*, L. Vargo\*, C. Kelly\*, T. Bongorno\*, A. Dolish\*, L. Pavlik, M. Tiktin, S. Isteitieh\* A. Bartlett, T. Kulow.

Ohio-Michigan clinical sites:

University Hospitals of Cleveland, Division of Endocrinology, and University Hospitals Westlake Medical, Cleveland, OH: F. Ismail-Beigi, A. Krikorian, L. Moore, L. Richardson, E. Coles-Herman\*, K. Yee\*, J. Frankino, M. Jing\*, A. Sood, L. Hustak\*, M. Julius\*, L. Pavlik\*, T. Ross\*, L. Long\*, W. Schwing\*, M. Tiktin\*, M.K. Sullivan\*, L. Strauss\*, K. Behm\*, F. Eskandari\*, C. Hall\*, D. Hayes\*, K. Horowitz, S. Isteitieh\*, Z. Madhun\*, E. Seeholzer\*, J. Shina\*, H. Taylor\*, A. Schnall\*, S. Huang, M. Heeg, J. Tang, J. Belkin\*, M.S. Lee\*, T. Joly\*.

St. Vincent Charity Hospital, Lipid Research Center, Cleveland, OH: L.S. Sadler, M. Griffith\*, A. Hornsby\*, K. Klyn, E. Ospelt, L. Long, M. DeSmit\*, P. McCann, N.P. Schmidt\*, C. Gottfried, T. Kulow, J. Zaletal\*, M.S. Kapadia, L. Smith\*.

University Suburban Health Center, South Euclid, OH: A.M. Schnall, L. Dragmen, R. Ellert\*, J. Smith, J. Leksan, T. Sussman, S. Huang, M. Heeg, J. Tang, J. Belkin\*, M.S. Lee\*, T. Joly\*.

Cleveland Veterans Affairs (VA) Medical Center (VAMC), Department of Medicine, and Ravenna Community Based Outpatient Clinic, Cleveland, OH: F. Ismail-Beigi, L. Hustak\*, M. Julius\*, W. Schwing, M. Tiktin\*, J. Anselmo\*, F. Eskandari\*, S. Daymeyer\*, C. Hall\*, D. Hayes\*, K. Horowitz\*, S. Isteitieh\*, C. Johnson\*, E. Kern, M.A. Richmond\*, L. Richardson, K. Roberts\*, J. Shina\*, A. Sood, P. Suhan\*, H. Taylor\*, S. Watts\*, J. Martin, L. Moor\*, B. Burtch\*, S. Ober, G.J. Strauss, A. Leone, J. Belkin\*, S. Huang\*, K. Frank\*, D. Stephens\*, M.S. Lee\*, T. Joly\*.

The Cleveland Clinic Foundation, Cleveland, OH: B.J. Hoogwerf\*, J. Brakeman, M. Matzinger\*, J. Newsome\*, J. Becker\*, S. Bizjack\*, B. Clingman\*, S. Curtas-Thomas, G. Depietro\*, R. Ellert\*, C. Horner, G. Bunae\*, A. Hamrahian\*, A. Hawkins\*, T. Head\*, S. Iannica\*, L. Jones\*, P. Kaiser, R. McCoy, A. Mehta, L. Olansky, A. Orasko, S. Reddy\*, D. Ross\*, L. Shockley\*, E. Siraj\*, M. Williams\*, R. Zimmerman M.Hamaty.

Your Diabetes Endocrine Nutrition Group, Mentor, OH: D. Weiss, K.A. Fagan, T.M. Hanslik\*, J. Farrell\*, P. Brys\*, M. Oigny, K. Prokop, K. Lenardic\*, T. Karapanzic\*, S. Huang, M. Heeg, J. Tang, J. Belkin\*, M.S. Lee\*, T. Joly\*.

Medical University of Ohio, Department of Medicine, Ruppert Health Center, Toledo, OH: B. Akpunonu, R. Franco-Saenz†, J. Gilmore, M. Gilmore, L. Godfrey\*, P. Ross\*, B. Bauer, M. Christie\*, A. Lopez, P. Mulrow, C. Peters\*, R. Pop-Busui\*, J. Roman\*, C. Smith\*, J. Bick\*, Z. Blust\*, P.T. Nelsen, D. Marcus\*.

The Ohio State University Medical Center, Division of Endocrinology, Diabetes and Metabolism, Columbus, OH: K. Osei, E.A. Dziengelewski\*, H. Breedlove, D. Boland\*, C. Casey Boyer, S. Cataland, P. A. Kearns, J.E. Irwin, D.P. Schuster, J.L. Varga-Spangler\*, T. Bowles, K. Weiland, K. Arnold; T. Evans\*, J. Bouttamy, A. Letson, E. Craig, F. Davidorf.

University of Cincinnati/VA Medical Center, Research Service, Cincinnati, OH: R.M. Cohen, K. Burton, J. Craig, B. Carter\*, J. Harrer\*, R. Hurd\*, D. Lopez-Stickney\*, C. Pritchard\*, A. Pfefferman\*, B.A. Ramlo-Halsted\*, C. McCormick, C. Riley, M. Strominger\*, A. Knittel, G. Groff\*, C. Bailey, A. Howald, N. Anderson, J. Laver Bierschbach, M. Tyzinski\*, B. Smith\*, S. Krug, V. Hershberger\*, R.K. Hutchins\*, L.A. Raymond\*.

Henry Ford Health System–New Center One, Detroit, MI: A.Thomas, D.M. Kahkonen\*, T. Cushman, M. Roman, A.M. Stys, K. White, M. Austin\*, C. Chatterton, J.K. Francis\*, C. Jones\*, D. Kruger, A. McLellan\*, F. Whitehouse, E. Higgins\*, S. Levy, A. Schoenherr\*, P. Edwards.

Grunberger Diabetes Institute, Bloomfield Hills, MI: G. Grunberger, L.C. Aman\*, A.H. Bandagi\*, K.M. Russell\*, C. Tucker, Y. Abidova\*, A. Amirikia, M. Narduccio, B. Billingsly.

Northeastern CCN: Columbia University College of Physicians and Surgeons, New York, NY: J.T. Bigger, C.R. Lopez-Jimenez, R. Bornholdt, L. Busaca, H.N. Ginsberg, P. Gonzales, D. Gosh\*, P. Love†, A. Kosok\*, E. Robinson\*, R. Steinman, C. Watson, G. Reyes.

Northeastern clinical sites:

Jacobi Medical Center, Bronx, NY: U.K. Schubart, M. Mendoza, G. Goswami, A. Laufer\*, J. Russo, N. Vincenty.

Albert Einstein General Clinical Research Center, Bronx, NY: M.H. Alderman, L. Carroll, M.J. Sanguily\*, J.U. Gorkin, A.C. Mayer, L. Ramos, V. Sessoms, A. Fritts Stewart\*.

Cornell Internal Medicine Associates, New York, NY: D. Brillon, J. Cordero, M.A. Richardson, E. Wei, F. Ganz, B.R. Meyer, J. Paley\*, S. Anderson\*, C. Charles\*, A. Dwoskin\*, R. Chiong\*, K. Hyams.

The Diabetes Care and Information Center of New York, Flushing, NY: D.L. Lorber, T. Arenstein\*, P. Depree, A.A. Elmorsy\*, J.M. Wendel, L.L. Zintl\*, P. August, M. Beck\*, M.D. Goldberg, M.J. Hofacker\*, M. Marotta-Kollarus\*, E.J.L. Ocampo, C.A. Resta, J.M. Tibaldi.

The Cooper Health System, Cherry Hill, NJ: A. Bastien\*, S. Grudzinski\*, P. Niblack, L. Abreu\*, T. Brobyn, K. Brown\*, M. Casale\*, D. Dougherty\*, G. Haddad, K. Heintz, M. Kelly\*,\* D. Linneman\*, C. Olivia, M.A. Salvador\*, P. Zee\*, D. Hyman.

The Cooper Health System, Cherry Hill, NJ: A. Bastien\*, S. Grudzinski\*, P. Niblack, L. Abreu\*, T. Brobyn, K. Brown\*, M. Casale\*, D. Dougherty\*, G. Haddad, K. Heintz, M. Kelly,\* D. Linneman\*, C. Olivia, M.A. Salvador\*, P. Zee\*, D. Hyman.

Great Lakes Medical Clinic Research, Westfield, NY: D.F. Brautigam, R. Fischer, J.M. Chiarot, D.M. Scharf\*, B. Nunn\*, J. Carlson, C. Flanders\*, M.R. Hagen, S. Newman, T.A. Gordon.

Naomi Berrie Diabetes Center, New York, NY: R. Goland, C.H. Tuck†, P. Kringas, J. Hey-Hadavi\*, J. Montes\*, J. Vargas-Jerez, J. Salas-Spiegel.

Ambulatory Care Network at Columbia University, New York, NY: A. Getaneh, J. Ramirez\*, E.F. Vasquez\*, G. Kranwinkel\*, S.A. Durant.

Irving Diabetes Research Unit, New York, NY: D.S. Donovan, G. Febres\*, C. Hernandez\*, M.A. Jonaitis, L. Mesa\*.

State University of New York Downstate Medical Center, Brooklyn, NY: M.A. Banerji, M. Norton, P. Patel\*, V. Daly, S. Hirsch, C. Jazmin, R. Khillan, D. Mendonca, A. Relingado, E. Sandoval, M. Tiewala.

Kings County, Brooklyn, NY: M.A. Banerji, M. Norton, P. Patel\*, V. Daly, S. Hirsch, C. Jazmin, R. Khillan, D. Mendonca, A. Relingado, E. Sandoval, M. Tiewala.

The Cooper Health System, Cherry Hill, NJ: A. Bastien\*, S. Grudzinski\*, P. Niblack, L. Abreu\*, T. Brobyn, K. Brown\*, M. Casale\*, D. Dougherty\*, G. Haddad, K. Heintz, M. Kelly,\* D. Linneman\*, C. Olivia, M.A. Salvador\*, P. Zee\*, D. Hyman.

Southeastern CCN: Wake Forest University School of Medicine, Department of Public Health Sciences, Winston-Salem, NC: D.C. Goff, Jr, J.H. Summerson, L. Crago, C.S. Blackwell\*, A. Bertoni\*, R.L. Blaine\*, J.K. Kirk, R.L. Spach, J. Williamson, J. Calles, J. Katula, D.B. Wishnietsky\*.

Southeastern clinical sites:

Duke University Medical Center, Durham, NC: M.N. Feinglos, J. Jones, M.B. Mason, M.A. Furst, W.J. Bean\*, G. Gedon-Lipscomb, J.B. Green, T. Parham\*, B.M. Satterwhite\*, C.R. Thacker.

Constant Care, Inc., Valdosta, GA: D. Padhiar, R. Noel\*, N. Padhiar, S. West\*, J. Braden, A. Francis\*.

Wake Forest University School of Medicine, Department of Geriatrics/Gerontology, Winston-Salem, NC: H.H. Atkinson, M. Dibari\*, J. Allen, J. Stanfield, T. Delvalle-Fagan, L.J. Gordineer, L. Gordon, M. Gordon\*, S.L. Smith\*, H. Yates.\*

Downtown Health Plaza, Winston-Salem, NC: C.F. Pedley, G. Zurek, M. Baird, B. Dunn\*, W. Kinder\*, S. Mauney.



University of North Carolina, Diabetes Care Center, Chapel Hill, NC: J.B. Buse, M.D. Duclos, R.E. Kirby\*, J.F. Largay, N.M. McDermott\*, A. Goley, S.S. Braithwaite, J.M. Dostou, E.A. Fasy\*, D.C. Kelly\*, C.E. Metz\*, J. Jeffries, D. Rubin\*, K. Vukojicik.

Holston Medical Group, Kingsport, TN: J.L. Miller, W. Besterman, S.M. Norton\*, J. Weatherly\*, S. Bishop\*, B. Cross, K. Nuss\*, M. Surgenor\*, D. Alley\*, A. Farmer\*, J. Foard, J. White, Y. Wood\*.

Carolinas Medical Center Family Practice, Charlotte, NC: M. Dulin, J. Konen\*, T. Barringer\*, K. Andrews\*, C. Hoffman\*, C. Morris\*, S. Norton, P. Tochiki\*, G. Reinblatt\*, P. Bruner\*.

Robeson Health Care Corporation, Fairmont Clinic, Fairmont, NC: R. Peace, D.O. Stuart\*, J. Strickland, L. Cummings\*, D. Craig\*, J. Stanfield\*, J. Morgan\*.

Robeson Health Care Corporation, Julian T. Pierce Clinic, Pembroke, NC: R. Peace, D.O. Stuart\*, J. Strickland, L. Cummings\*, D. Craig\*, J. Stanfield\*, G. Williams\*.

Wake Forest University School of Medicine, Departments of Internal Medicine and Endocrinology, Winston-Salem, NC: J.R. Crouse, L. Menon, S. Marion\*, D. Davis\*, B. Cabrera\*, J. Calles, T. Chandler, J. Ellis, E. Kouba, P. Riddle, E. Myers\*.

Tulane University Health Science Center, New Orleans, LA: V. Fonseca, J. John-Kalarickal\*, R.H. McDuffie, N.O. Asafu-Adjaye, S.M. Leger, P. Reilly, G. Afner, F. Arrey\*, S. Asnani, E. Borshard\*, D. Boyd\*, A.Cemo, S. Chennur\*, P. Dupart, R. Garg\*, G.P. Girindra\*, B. Gouda\*, W. Itoua-N'Ganongo\*, I. Innocent-Ituah\*, C. Johnson\*, N. Kuhadiya, M. Kukreja\*, I. Mangan-Mbondi\*, S. Mason\*, C. McLain, J. Naylyanya\*, K. Nazereth\*, S. Nazereth\*, S. Singh, T. Thethi, K. Varnado\*, R. Williams\*.

Kaiser Permanente, Clinic Atlanta Crescent Medical Center, Tucker, GA: J.I. Barzilay, M. Eley\*, K. Bader, D. Curry-Ball, S. Goodman\*, M. Stevens.

VA CCN: Memphis VAMC, Memphis, TN: William C. Cushman, Therese S. Geraci, Sandra M. Walsh, Linda G. Coley, Marshall B. Elam, Diane I. Pickering\*, C.Huff.

VA clinical sites:

Memphis VAMC, Hypertension/Lipid Research Clinic, Memphis, TN: M.B. Elam, C.W. Thompson\*, L. Lichtermann, S. Peebles, J. Turner-Bates\*, M. Heimberg, D. Childress, J. Turner, J. Jasper\*, J. Coley.

Baltimore VAMC, Baltimore, MD: B.P. Hamilton, J. Hamilton, G. Kuzbida\*, W. Hatten, Jr, A. Lancaster, J. Haywood, J.Luck, D. Bannerman-Wood\*.

Carl T. Hayden VAMC, Phoenix, AZ: J. Felicetta, M. Bourne- Collo\*, M.E. Svoboda, D. Clothier\*, M. Deitz†, C. Flaughter\*, P. Hayward\*, T. Scheibe\*, S. Velarde, S. Heritage\*, J.P. Nelson, D. Heritage\*, C.Martinez\* .

Atlanta VAMC Medical Service, Decatur, GA: M.E. Sweeney, D. Harrelson\*, S. McConnell, F. Watson, R. Johnson, L. Whittington, M. Nanes, M. Salles, C Rice\*, C. Cowden\*.

Ralph H. Johnson VAMC, Primary Care, Charleston, SC: J. Basile, D.B. Ham, B. North-Lee\*, H.A. Baig, S.U. Rehman, J. Mixson, D Nelson\*.

G. V. (Sonny) Montgomery VAMC, Research Department, Jackson, MS: K.A. Kirchner, L.A. Hinton, L. Mack\*, C. Adair\*, B. James\*, A. Spencer, A. Jones.

VAN Y Harbor Healthcare System, New York, NY: L. Katz, E.A. Richardson, A.G. Goldberg\*, A. Nieves\*, J.E. Russo\*, J. Adams\*, S.A. Sochalski\*, M.Coles\*, S. Anderson\*, M. Williams\* D. Hoffman†.

Washington VAMC, Washington, DC: V. Papademetriou, B. Gregory, R. Alignay\*, E. Nysten, B. Rajendran, R. Hodges, S. Amodeo, A. Ross\*, A. Notargiacomo\*, M. Metcalfe\*, P. Narayan\*, D. Wojackovski\*

St. Louis VAMC, St. Louis, MO: S. Giddings, E. Clark, A. Pittler, R. Davis\*, P. Harris, K. Waidmann, L. Conwill, S. Felton, A. Chen.

Central Arkansas Veterans Healthcare System, Little Rock, AR: D.L. Simmons, J.J. Cooper\*, K. Dishongh, R. Bates\*, K. Bhaghayath\*, P. Choksi\*, S. Conley\*, S. Elbein\*, F. Faas, Z. Hamid\*, J. Johnson, P. Johnson\*, A. Mayo\*, M.S. Moriarty\*, G. Nair\*, D. Rani\*, N. Rasouli\*, S. Said\*, N. Rassouli\*, M. Rodriguez\*, K. Thomas\*, K. Watson\*, D. Williams\*, A. Makdissi.

Coordinating Center: Wake Forest University School of Medicine, Winston-Salem, NC: R.P. Byington, W.T. Ambrosius, R.T. Anderson\*, J. Barnes, J. Beal, C. Bell\*, D.E. Bonds\*, S. Burton\*, C. Collins, D. Cook, B. Craven, T. Craven, D. Dunbar\*, G. W. Evans, P. Feeney\*, C. D. Furberg, C. M. Greven, J. Griffin, L. Harvin, J. Hepler, L. Howard\*, L.T. Howard-Perdue, M. Hough, W. Hwang\*, A. Kimel, D. Lefkowitz, A. Lopina\*, J. Lovato, L.C. Lovato, M.E. Miller, D. Reboussin\*, S. Rushing, L. Sanders, L. Sims, C. Stowe, M. Walkup\*, S. Wilmoth, K. Wilson, N. Woolard.

Drug Distribution Center: VA Cooperative Studies Program Clinical Research Pharmacy Coordinating Center, Albuquerque, NM: D. Raisch, R. Ringer, M. Sather, B. DelCurto, D. Garnand.

ECG Reading Center: Wake Forest University School of Medicine, Winston-Salem, NC: R. Prineas\*, C. Campbell, Z. Zhang, L. Kesler, S. Hall\*, S. Hensley, Y. Li, E.Z. Soliman, D. Milne

Central Chemistry Laboratory: Northwest Lipid Research Laboratories, Seattle, WA: S. Marcovina, J. Chmielewski, K. Gadbois, V. Gaur, G. Strylewicz, M. Ramirez, S. Waddell, M. Mehan\*.

ACCORD-MIND MRI Reading Center: University of Pennsylvania, Philadelphia, PA: R.N. Bryan, C. Davatzkios, G. Moonis, L. Desiderio, S. D'Arcy\*.

Fundus Photograph Reading Center: University of Wisconsin Medical School, Madison, WI: M. Davis, R. Danis, S. Gangaputra, L. Hubbard, N. Robinson, J. Dingedine, D. Thayer, H. Wabers, M. Neider, B. Esser, T. Harding, R. Susman, C. Hurtenbach, V. Gama, M. Schiffman, S. Johnson\*, T. Graham\*

Project Office:

National Heart, Lung, and Blood Institute (NHLBI), Bethesda, MD: D.G. Simons-Morton, L. Cooper\*, M. Domanski, C. Nwachuku\*, Y. Rosenberg, M. Salive\*, P. Savage, J.L. Fleg, J.A. Cutler, N. Geller, D. Follmann\*, M. Proshan\*, C. Jennings, E. Schaeffer\*, P. Mills,\* J. Bittner\*, R. Kirby, P. Frommer†, L. Fine, J. Chan\*.

National Institute of Diabetes and Digestive and Kidney Diseases (NIDDK), Bethesda, MD: J. Fradkin, S. Malozowski, C. Meyers, T. Hostetter\*.

National Institute on Aging (NIA), Bethesda, MD: L. Launer.

National Eye Institute (NEI), Bethesda, MD: E.Y. Chew.

Centers for Disease Control and Prevention (CDC), Atlanta, GA: A. Albright, K.M.V. Narayan, M. Engelgau\*, P. Zhang.

\* No longer affiliated with study unit.

† Deceased.

## Section 2. The Action to Control Cardiovascular Risk in Diabetes Eye Study Group.

**Canadian Clinical Network:** D. Albiani, J. Baker, R. Bates, A. Berger, R. Burhmann, C. Carlton, N. Caron, A. Cruess, K. Dalton, S. Danby, P. Darvill, R. Dempsey, R. Duchesne, V. Evalmpiev, J. Gonder, L. Hall, R. Hammond, M. Hannah, B. Harrison, P. Harvey, A. Hoskin-Mott, A. Kherani, P. Lamy, V. Liang, C. Lincoln, T. MacDonnell, M. Mathen, A. Merkur, B. Murphy, M. Perreault, M. Potter, M. Quigley, C. Riopel, S. Riopel, N. Ronald, B. Schwanke, C. Simoes, R. Smart, F. Stockl, M. Tennant, M. Trahan, G. Williams.

**Western Clinical Network:** C. Anderson, S. Bailey, B. Chan-Kai, E. Chuang, T. Clark, B. Clifton, T. Daly, S. Day, A. Doan, C. Douma, M. Feldman, C. Flaxel, P. Francis, G. Froman, D. Fuerst, R. Gannon, J. Gaultney, A. Hannekens, C. Howell, J. Hubbs, T. Hwang, J. Jones, J. Jones, M. Klein, K. Kubis, C. Lambret, A. Lauer, J. LeClaire, M. Lemor, J. Leslie, M. Meallet, W. Milam, R. Miles, D. Minnis, B. Nicholson, S. O'Connell, L. Partamian, S. Pickell, E. Redenbo, P. Rice, D. Saperstein, T. Schlesinger, B. Serar, P. Steinkamp, C. Stephens, E. Vandyck, A. Vemulakonda, P. Wallace, K. West, D. Wilson, R. Witherspoon, S. Yeh.

**Minnesota-Iowa Clinical Network:** T. Aly, K. Anderson, R. Bellefeuille, M. Blatt, C. Boldt, E. Carpel, B. Critser, J. Emanuel, E. Engel, J. Engman, W. Farah, J. Folk, C. Fountain, L. Gill, M. Harker, E. Heffron, C. Hewitt, D. Johnson, S. Karakas, J. Kobrin, N. Kramarevsky, J. Laechelt, S. Loftus, B. Loy, M. Luczak, V. Mahajan, R. Manka, W. McMichael, K. Morgan, A. Nathenson, A. Pfaff, J. Rademaker-Syrjamaki, J. Richison, R. Ricke, S. Russell, S. Sanderson, G. Schwartz, S. Silbert, T. Stockenstrom, E. Stone, J. Terry, J. Tierney, A. Towey, R. Verdick, G. Webster, A. Whitmore, T. Wiengeist.

**Ohio-Michigan Clinical Network:** S. Allen, A. Amirikia, J. Belkin, B. Benetz, L. Breeding, N. Brugnioni, S. Burke, E. Burnside, I. Cardenas, N. Conley, E. Craig, M. Crowell, F. David, P. Edwards, M. Ehlert, E. Eleff, T. Feco, K. Frank, L. Hanratty, M. Harrod, V. Hershberger, R. Hill, S. Huang, R. Hutchins, C. Johnson, T. Joly, P. Kaiser, M. Kapadia, M. Keating, S. Krug, M. Lee, A. Letson, D. Marcus, S. Mawhorter, T. Mistler, P. Nelson, S. Ogilvy, G. Pankhurst, L. Raymond, D. Ross, B. Rusinek, S. Savage, L. Schillace, S. Schuster, A. Singh, A. Smith, D. Stephens, B. Stern, J. Tang, T. Troszak, S. Walls, C. Wieczorek, R. Wyszynski.

**Northeast Clinical Network:** K. Albret, D. Armiger, G. Barile, E. Baron, G. Brown, C. Bunce, W. Carrasquillo-Boyd, D. Casper, P. Chan, S. Chang, J. Crofts, D. Crowder-Porter, M. Doran, H. Fine, M. Fineman, L. Galati, S. Groch, R. Groh, H. Havnaer, A. Ho, R. Iranmanesh, R. Kaiser, S. Kiss, A. Kozbial, K. Langton, D. Lazarro, S. Lee, T. Lee, B. Markowitz, J. McNamara, M. Moszczynski, M. Ober, C. Olivia, L. Priore, C. Regilo, D. Rho, R. Rothermel, J. Scheindlin, W. Schiff, E. Schrier, R. Schrimmer, T. Smith, M. Sprin, S. Tsang, M. Turano, J. Vander, J. Wilder, F. Zizi.

**Southeast Clinical Network:** R. Ayyala, S. Bearely, R. Burns, D. Cantrall, J. Cisco, M. Clark, M. Cooney, J. Crayton, P. Dean, N. Englebrecht, R. Esquejo-Leon, J. Fricks, P. Garton, C. Greven, R.

Halpern, M. Hartnett, G. Hoffmeyer, T. Jackson-Hawks, M. Kelly, A. Khanifar, V. Kummer, S. Kurup, A. Laurens, J. LeBlanc, J. Lee, J. Lummis, B. McCuen, K. McHugh, T. Meredith, D. Miller, J. Napoli, J. Pantell, D. Peterson, G. Rankin, C. Ryburn, A. Seaton, K. Shields, M. Skelly, K. Thompson, M. Tyler, R. Weidman.

**Veterans Affairs Clinical Network:** K. Aletter, R. Ballinger, G. Brough, A. Brown, S. Brummett, R. Curtis, A. Drawart, S. Hankins, R. Harper, L. Kanda, S. Melendrez, T. Minas, S. Pothoff, N. Ravi, E. Schwartz, C. Troillet, D. Troillet, M. White, J. Williamson.

### Section 3. Description of ETDRS grading scale.

Table 1. Abbreviated Summary of ETDRS Final Retinopathy Severity Scale for Individual Eyes

| Level  | Severity                                                                          |
|--------|-----------------------------------------------------------------------------------|
| 10     | DR absent                                                                         |
| 20     | Microaneurysms only                                                               |
| 35     | Mild NPDR (HE, SE and/or mild H)                                                  |
| 43     | Moderate NPDR (mild IRMA or moderate H)                                           |
| 47     | Moderately severe NPDR (mild VB, moderate IRMA or severe H)                       |
| 53     | Severe or very severe NPDR (moderate/severe VB, severe IRMA and/or very severe H) |
| 60     | Scars of photocoagulation for PDR or severe NPDR (SPC)                            |
| 61     | Mild PDR                                                                          |
| 65     | Moderate PDR                                                                      |
| 71, 75 | High risk PDR                                                                     |

H- Hemorrhage, HE – hard exudates, SE – soft exudates, IRMA – intraretinal microvascular abnormalities, VB –venous beading, DR- diabetic retinopathy, NPDR – Non proliferative diabetic retinopathy, PDR – proliferative diabetic retinopathy. Levels 35-53 require presence of microaneurysms in addition to specified abnormalities. The definition for each level assumes that the definition for any higher level is not met. Severities of abnormalities are defined in References 2 and 6.

Table 2. Abbreviated Summary of ETDRS Final Retinopathy Severity Scale for Persons

| Level             | Description                           | Scale step |
|-------------------|---------------------------------------|------------|
| 10/10             | No DR                                 | 1          |
| 20/<20            | Microaneurysms only, one eye          | 2          |
| 20/20             | Microaneurysms only, both eyes        | 3          |
| 35/<35            | Mild NPDR, one eye                    | 4          |
| 35/35             | Mild NPDR, both eyes                  | 5          |
| 43/<43            | Moderate NPDR, one eye                | 6          |
| 43/43             | Moderate NPDR, both eyes              | 7          |
| 47/<47            | Moderately severe NPDR, one eye       | 8          |
| 47/43             | Moderately severe NPDR, both eyes     | 9          |
| 53/<53            | Severe or very severe NPDR, one eye   | 10         |
| 53/53             | Severe or very severe NPDR, both eyes | 11         |
| 60 or 61/<60      | Mild PDR and/or SPC, one eye          | 12         |
| 60 or 61/60 or 61 | Mild PDR and/orSPC, both eyes         | 13         |
| 65/<65            | Moderate PDR, one eye                 | 14         |
| 65/65             | Moderate PDR, both eyes               | 15         |
| 71+/<71           | High risk PDR, one eye                | 16         |
| 71+/71+           | High risk PDR, both eyes              | 17+        |

Table 1 presents an abbreviated and slightly modified version of the Early Treatment Diabetic Retinopathy Study (ETDRS) Final Diabetic Retinopathy Severity Scale for individual eyes. The underlying scale had 6 steps, designated 1-6, which are retained here as the first digits of levels 10-65.<sup>1</sup> The second digit of each level, where different from 0, represents the final of several alternative definitions that were considered during development of the ETDRS scale and has no numerical meaning.<sup>2</sup> Level 60 was added after publication of the scale to prevent eyes in which few or none of the abnormalities graded remained following photocoagulation from being categorized as having mild or no retinopathy. When progression along the scale is assessed levels 60 and 61 are pooled as a single category (the 7<sup>th</sup> step on the Eye Scale). Levels 71 and 75 are usually considered separate steps. The scale is ordinal, but one of the goals in designing

it was that the steps divide the retinopathy severity spectrum into similar, clinically reasonable intervals.

In Table 2 the eye levels defined in Table 1 are combined for persons in what has been called the “worse eye emphasized” method; persons are first categorized by maximum severity level in either eye and then by severity level in the second eye, either the same level as the first eye (e.g., 35/35) or any lesser level (e.g., 35/<35).

In the Diabetes Control and Complications Trial (DCCT) progression (worsening) by 3 or more steps on the person scale was chosen as the principal retinopathy outcome measure, in part because it was considered to be a clinically important change and in part to compensate for grading variability. In quality control exercises conducted throughout the trial exact agreement between replicate gradings was reported as ranging from 53.3% to 67.6%, agreement within 1 step from 84.3% to 95.0% and agreement within 2 steps from 96.2% to 98.3%.<sup>3</sup> Other outcomes frequently used are progression by 2 or more steps on the eye scale, which is similar to 3 or more steps on the patient scale, and 2 or more steps on the person scale, which increases the number of outcomes but may reduce precision.<sup>4,5</sup>

#### References

1. Klein BE, Davis MD, Segal P, Long JA, Harris WA, Haug GA, Magli YL, Syrjala SE. Diabetic retinopathy. Assessment of severity and progression. *Ophthalmology* 1984;91:10-17
2. Early Treatment Diabetic Retinopathy Study Research Group. Fundus photographic risk factors for progression of diabetic retinopathy. ETDRS Report Number 12. *Ophthalmology* 1991;98:823-833
3. The Diabetes Control and Complications Trial Research Group. The effect of intensive diabetes treatment on the progression of diabetic retinopathy in insulin-dependent diabetes mellitus. *Arch Ophthalmol* 1995;113:36-51
4. Klein R, Klein BE, Moss SE. How Many Steps of Progression of Diabetic Retinopathy Are Meaningful? The Wisconsin Epidemiologic Study of Diabetic Retinopathy *Arch Ophthalmol*. 2001;119:547-553
5. Chew EY. Surrogate Outcomes for Clinical Trials: Use with Caution. *Arch Ophthalmol*. 2001;119:576-578.
6. Early Treatment Diabetic Retinopathy Study Research Group. Grading diabetic retinopathy from stereoscopic color fundus photographs - an extension of the modified Airlie House classification. ETDRS Report Number 10. *Ophthalmology* 1991; 98:786-806



## Section 4. ACCORD Eye CONSORT diagram

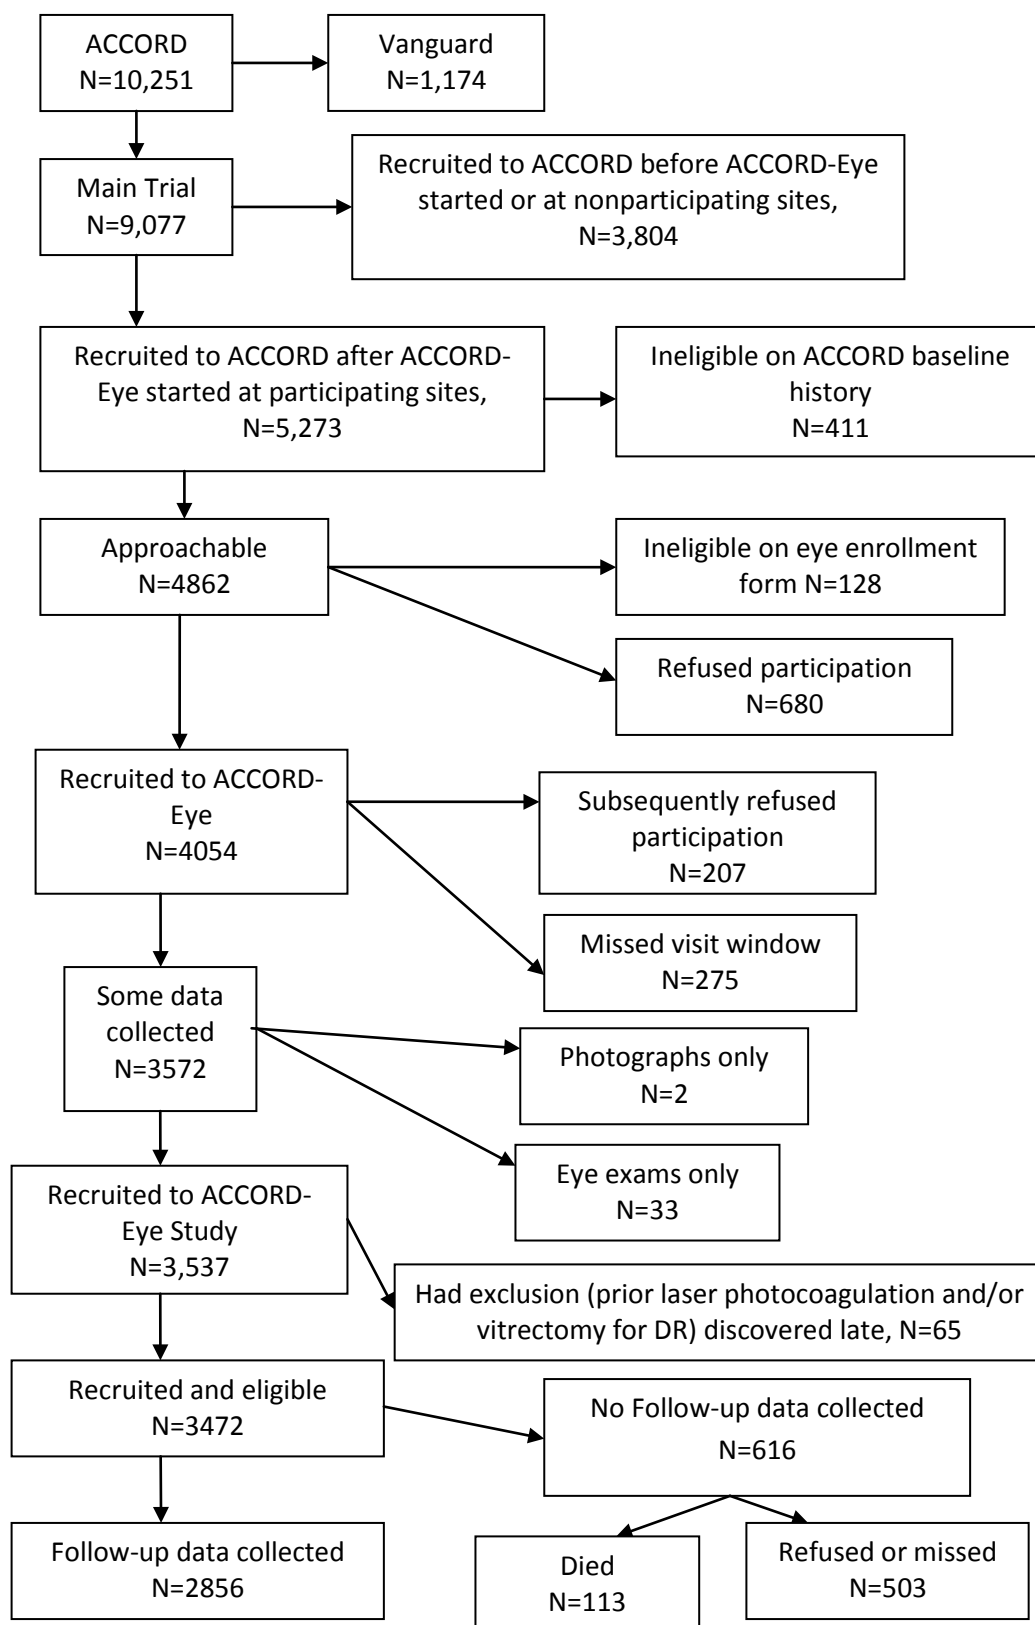

## Section 5. Baseline characteristics of ACCORD Eye participants with and without follow-up and rest of ACCORD main trial

Baseline characteristics of participants enrolled in ACCORD Eye Study (with and without follow-up) with that of participants enrolled in the remainder of the ACCORD main trial. Reported values are either the means (SDs) or N (percentages).

| Variable                           | ACCORD Eye Study<br>Participants with<br>Follow-up | ACCORD Eye Study<br>Participants without<br>Follow-up | Remaining ACCORD<br>Main Trial Participants |              |
|------------------------------------|----------------------------------------------------|-------------------------------------------------------|---------------------------------------------|--------------|
|                                    | N=2856                                             | N=616                                                 | N=5605                                      |              |
| Age (yr)                           | 61.6 (6.3)                                         | 62.1 (7.1)                                            | 62.3 (6.9)                                  |              |
| Diabetes Duration (yr)             | 10.0 (7.1)                                         | 10.3 (7.0)                                            | 11.2 (8.1)                                  |              |
| Female                             | 1090 (38.2%)                                       | 243 (39.4%)                                           | 2152 (38.4%)                                |              |
| Previous cardiovascular event      | 895 (31.3%)                                        | 228 (37.0%)                                           | 2079 (37.1%)                                |              |
| Nonwhite                           | 860 (30.1%)                                        | 218 (35.4%)                                           | 2088 (37.3%)                                |              |
| HbA1c (%)                          | 8.2 (1.0)                                          | 8.4 (1.1)                                             | 8.2 (1.0)                                   |              |
| HDL (mg/dL)                        | 41.9 (11.3)                                        | 41.7 (10.9)                                           | 41.8 (11.7)                                 |              |
| LDL (mg/dL)                        | 100.7 (32.7)                                       | 105.3 (35.0)                                          | 105.0 (34.3)                                |              |
| Triglycerides (mg/dL)              | 195.1 (162.6)                                      | 198.2 (144.2)                                         | 189.6 (148.7)                               |              |
| Systolic BP (mm Hg)                | 134.5 (17.0)                                       | 136.4 (17.2)                                          | 136.5 (17.1)                                |              |
| Diastolic BP (mm Hg)               | 74.9 (10.5)                                        | 75.3 (11.3)                                           | 74.7 (10.7)                                 |              |
| Urinary Albumin/Creatinine (mg/mg) | 71.8 (253.1)                                       | 102.7 (322.4)                                         | 102.7 (382.9)                               |              |
| BMI (kg/m <sup>2</sup> )           | 32.4 (5.5)                                         | 32.7 (5.5)                                            | 32.2 (5.5)                                  |              |
| Visual Acuity (mean of both eyes)* | 75.9 (10.2)*                                       | 73.7 (10.9)*                                          | 72.8 (12.7)*                                |              |
| Smoking                            | Never                                              | 1188 (41.6%)                                          | 227 (36.9%)                                 | 2351 (42.0%) |
|                                    | Former                                             | 1280 (44.8%)                                          | 295 (47.9%)                                 | 2428 (43.4%) |
|                                    | Current                                            | 387 (13.6%)                                           | 94 (15.3%)                                  | 814 (14.6%)  |

\*Approximate Snellen Visual Acuity (74 to 78 letter = 20/30, 69 to 73 letters = 20/40)

## **Section 6. Longitudinal plots of A1c, HDL, triglycerides, and systolic BP**

Figure. Median A1c (a), HDL (b), triglycerides (c), and systolic blood pressure (d) by treatment assignment with 95% confidence intervals.

(a) A1C

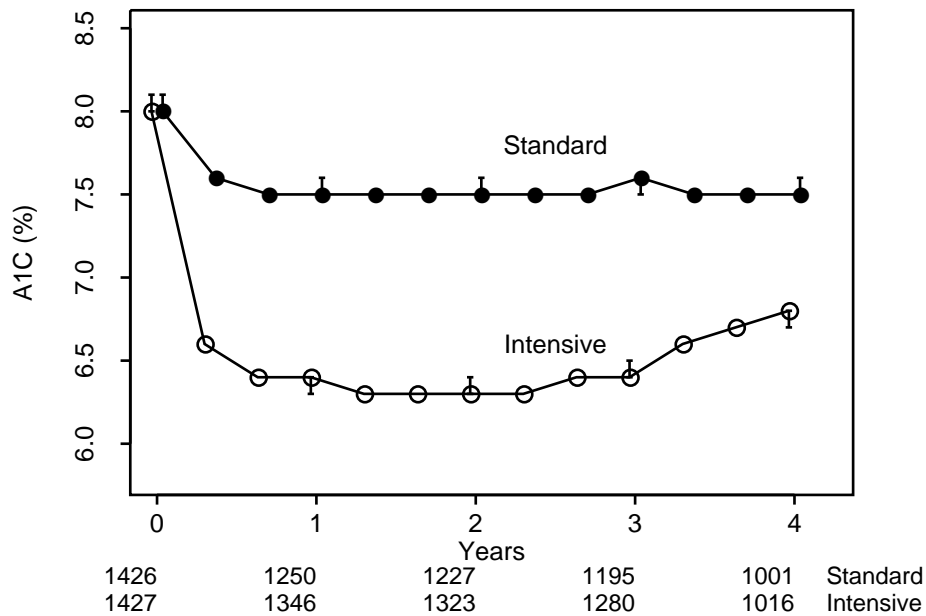

(b) HDL

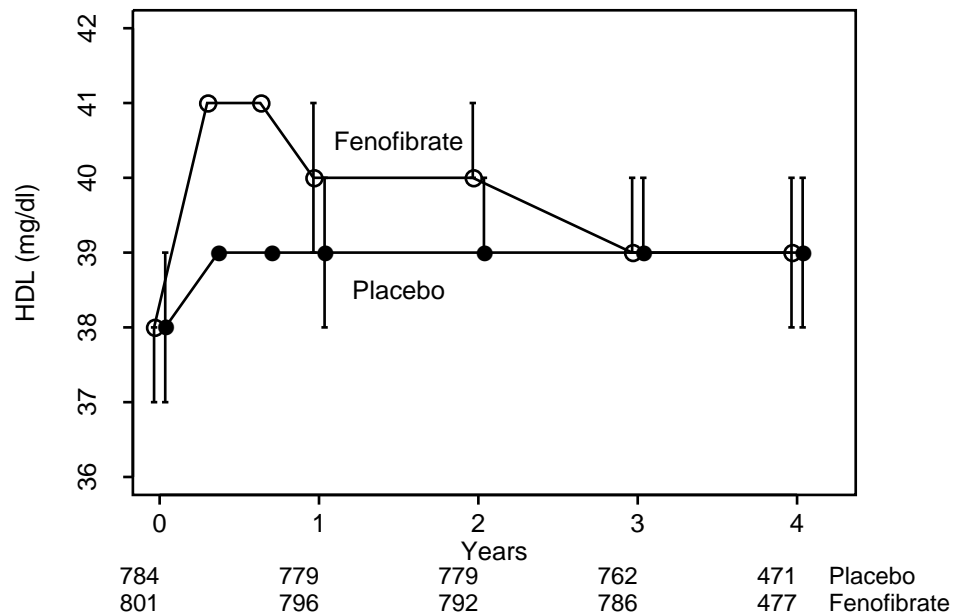

(c) Triglycerides

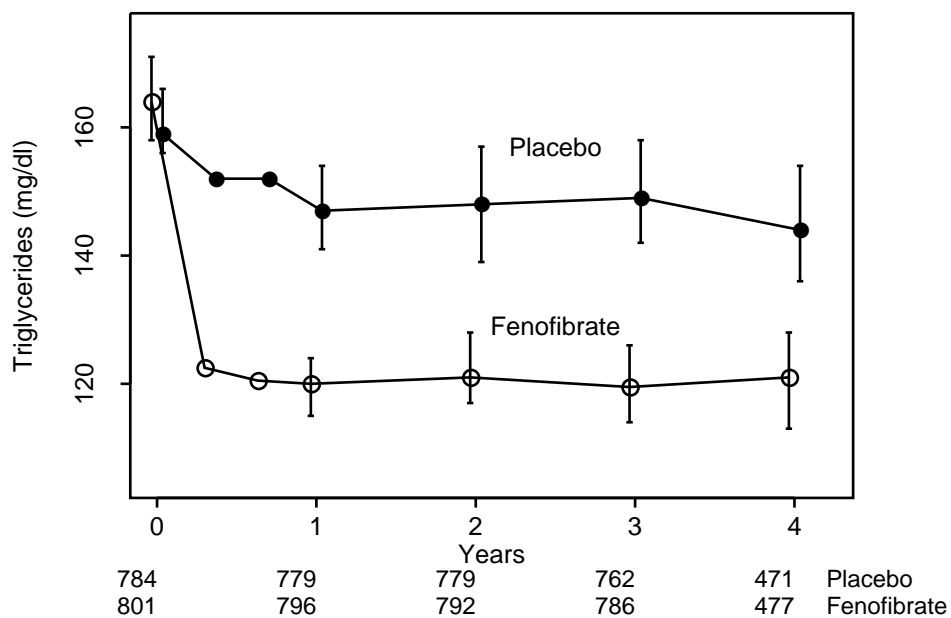

(d) SBP

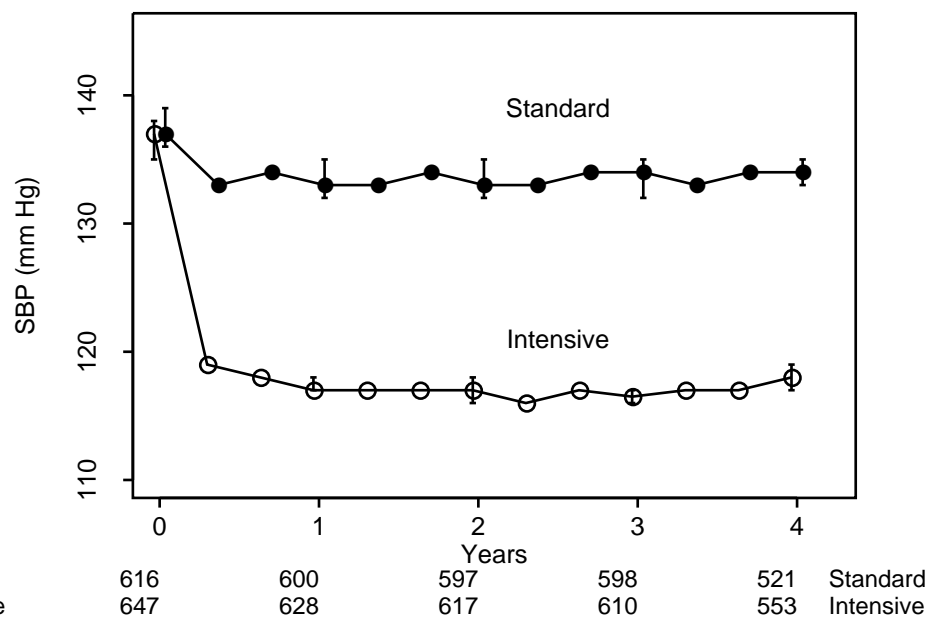

## Section 7. Additional ACCORD Eye analyses

Table 1. Percentages with DR progression (the ACCORD Eye primary outcome). Note: This expands the paper's Table 3 to provide rates for all treatment combinations.

|                 | Blood Pressure    |                  | Lipid            |                   |                     |
|-----------------|-------------------|------------------|------------------|-------------------|---------------------|
| <b>Glycemia</b> | Intensive         | Standard         | Fenofibrate      | Placebo           | <b>Totals</b>       |
| Intensive       | 9.2%<br>(29/315)  | 8.1%<br>(25/308) | 5.3%<br>(21/400) | 7.1%<br>(29/406)  | 7.3%<br>(104/1429)  |
| Standard        | 11.4%<br>(38/332) | 9.4%<br>(29/308) | 7.6%<br>(31/406) | 13.4%<br>(51/381) | 10.4%<br>(149/1427) |
| <b>Totals</b>   | 10.4%<br>(67/647) | 8.8%<br>(54/616) | 6.5%<br>(52/806) | 10.2%<br>(80/787) | 8.9%<br>(253/2856)  |

Table 2. Unadjusted and model adjusted proportions and confidence intervals. All confidence intervals are for the less intensive intervention minus the more intensive intervention.

|                   |                  | Unadjusted                            |                                                | Model Adjusted                        |                                                 |
|-------------------|------------------|---------------------------------------|------------------------------------------------|---------------------------------------|-------------------------------------------------|
| <b>Comparison</b> | <b>Trial Arm</b> | <b>Proportion with DR Progression</b> | <b>95% Confidence Interval For Difference*</b> | <b>Proportion with DR Progression</b> | <b>95% Confidence Interval For Difference**</b> |
| Glycemia          | Intensive        | 0.0728                                | (0.0108, 0.0527)                               | 0.0701                                | (0.0110, 0.0516)                                |
|                   | Standard         | 0.1044                                |                                                | 0.1014                                |                                                 |
| Lipids            | Fenofibrate      | 0.0645                                | (0.0101, 0.0649)                               | 0.0599                                | (0.0104, 0.0621)                                |
|                   | Placebo          | 0.1017                                |                                                | 0.0962                                |                                                 |
| Blood Pressure    | Intensive        | 0.1036                                | (-0.0488, 0.0169)                              | 0.1012                                | (-0.0487, 0.0146)                               |
|                   | Standard         | 0.0877                                |                                                | 0.0842                                |                                                 |

\*Uses the Agresti and Min exact confidence interval (Agresti A, MinY. (2001). On small-sample confidence intervals for parameters in discrete distributions. Biometrics 57: 963-971) as implemented in StatXact 8 PROCs (<http://www.cytel.com/>).

\*\*Approximate confidence intervals for model-adjusted proportions using the delta method approximation.

Table 3. Percentage of participants missing the primary outcome.

|                 | Blood Pressure     |                    | Lipid              |                    |                     |
|-----------------|--------------------|--------------------|--------------------|--------------------|---------------------|
| <b>Glycemia</b> | Intensive          | Standard           | Fenofibrate        | Placebo            | <b>Totals</b>       |
| Intensive       | 19.2%<br>(75/390)  | 19.4%<br>(74/382)  | 13.8%<br>(64/464)  | 17.6%<br>(87/493)  | 17.4%<br>(300/1729) |
| Standard        | 19.4%<br>(80/412)  | 16.8%<br>(62/370)  | 18.0%<br>(89/495)  | 18.2%<br>(85/466)  | 18.1%<br>(316/1743) |
| <b>Totals</b>   | 19.3%<br>(155/802) | 18.1%<br>(136/752) | 16.0%<br>(153/959) | 17.9%<br>(172/959) | 17.7%<br>(616/3472) |

Table 4. Assessment of differential missingness. (This compares the proportions in Table 3 using a two-sample chi-square test (unadjusted p-values) and using the primary logistic regression model.)

| Treatment      | Unadjusted P-value | Adjusted (Primary Model) P-value |
|----------------|--------------------|----------------------------------|
| Glycemia       | 0.55               | 0.49                             |
| Lipid          | 0.25               | 0.23                             |
| Blood Pressure | 0.53               | 0.48                             |

Table 5. Sensitivity analyses comparing the primary analysis to the multiple imputation analyses.

| Analysis                                                           | Effect         | OR   | 95% CI      | P-value |
|--------------------------------------------------------------------|----------------|------|-------------|---------|
| Primary                                                            | Glycemia       | 0.67 | (0.51,0.87) | 0.0025  |
|                                                                    | Lipid          | 0.60 | (0.42,0.87) | 0.0056  |
|                                                                    | Blood Pressure | 1.23 | (0.84,1.79) | 0.29    |
| Multiple imputation, separate imputation models by treatment group | Glycemia       | 0.68 | (0.51,0.91) | 0.0092  |
|                                                                    | Lipid          | 0.61 | (0.43,0.87) | 0.0058  |
|                                                                    | Blood Pressure | 1.20 | (0.79,1.81) | 0.39    |
| Multiple imputation, one imputation model                          | Glycemia       | 0.67 | (0.51,0.87) | 0.0029  |
|                                                                    | Lipid          | 0.58 | (0.40,0.84) | 0.0043  |
|                                                                    | Blood Pressure | 1.25 | (0.82,1.90) | 0.29    |

## Section 8. ACCORD design and details of allocation to blood pressure and lipid Trials (Details from ACCORD Protocol, found on [www.accordtrial.org](http://www.accordtrial.org))

ACCORD was designed as a double 2X2 factorial trial of 10,000 eligible participants. The factors employed in the design were: intensive versus standard glycemic control, intensive versus standard blood pressure control, and, in the presence of LDL-C lowering, fibrate versus placebo. As shown in the figure below, all 10,000 required participants were to be randomized to one or the other glycemic treatment groups, and to either blood pressure or lipid trial treatment groups in two non-overlapping 2 X 2 layouts. Specifically, and based upon the sample size requirements for the separate blood pressure and lipid trials, it was planned that 4200 blood pressure-eligible participants would be assigned to and randomized within the blood pressure trial and 5800 lipid participants would be assigned to and randomized within the lipid trial.

| Glycemia<br>Trial | Blood Pressure Trial |                    | Lipid Trial |         |       |
|-------------------|----------------------|--------------------|-------------|---------|-------|
|                   | SBP < 120<br>mm Hg   | SBP < 140<br>mm Hg | Fibrate     | Placebo |       |
| A1c < 6.0%        | 1050                 | 1050               | 1450        | 1450    | 5000  |
| 7.0% < A1c < 7.9% | 1050                 | 1050               | 1450        | 1450    | 5000  |
|                   | 2100                 | 2100               | 2900        | 2900    |       |
|                   | 4200                 |                    | 5800        |         | 10000 |

All 10,000 participants had to be eligible for the overarching glycemia trial and for either the blood pressure and/or lipid trial. Participants eligible for the lipid trial but not the blood pressure trial were randomized to one of the four cells in the lipid and glycemic control 2 X 2 layout; similarly for those eligible for the blood pressure intervention but not the lipid intervention. Participants eligible for both the lipid and the blood pressure interventions were randomly assigned to one or the other trial using probabilistic weights designed to ensure that the 4200 BP/5800 Lipid split was efficiently achieved. Because progress towards the BP goal of 4200 subjects was more rapid than progress towards the Lipid goal of 5800, the vast majority of participants eligible for both trials were allocated to the Lipid trial (see consort diagram in the online supplements for the BP and Lipid trials). Furthermore, the BP trial was allowed to over-recruit in order to efficiently meet the goal of 10,000 subjects enrolled for the glycemia trial. Overall, 10,251 participants were recruited for the glycemia trial, with 4733 also enrolled in the BP trial and the remaining 5518 enrolled in the Lipid trial.

## **Section 9. ACCORD Eye Study design and details of eligibility criteria**

(Details from ACCORD Eye Study Protocol, found on [www.accordanc.org](http://www.accordanc.org))

The ACCORD Eye Study consisted of 2 eye exams with fundus photography of 7 stereoscopic fields, at baseline and year 4 of follow-up. The length of follow-up for subjects in the diabetic retinopathy study ranged from 4 to 6 years. Patients who had a history of laser photocoagulation or vitrectomy for diabetic retinopathy in either eye at baseline were excluded from the Eye Study. All ACCORD participants without an exclusion criterion were eligible for ACCORD Eye.

The main ACCORD Trial, which followed the Vanguard Phase, recruited and randomized patients from February 2003 through October 2005. The Eye Study recruited patients from October 2003 through February 2006.

The patients enrolled in the Vanguard Phase did not participate in the Eye Study because baseline fundus photographs were not collected. All clinical centers from all clinical networks were encouraged to participate in the Eye Study; however, only 68 of the 77 clinics recruited patients into the ACCORD Eye Study. Due to the lag between the start of recruitment for the main trial and for the Eye Study, participants who were randomized for the main trial in February 2003 through June 2003 (later at some clinical sites due to later IRB approval) were not eligible for recruitment into the Eye Study because baseline fundus photographs could not be obtained within four months of randomization.



## **Section 10. Longitudinal plots of A1c, HDL, triglycerides, and systolic BP**

Note: These plots are presented in Section 6. They are reproduced here in a larger format to allow greater clarity.

# Median A1C and 95% CIs

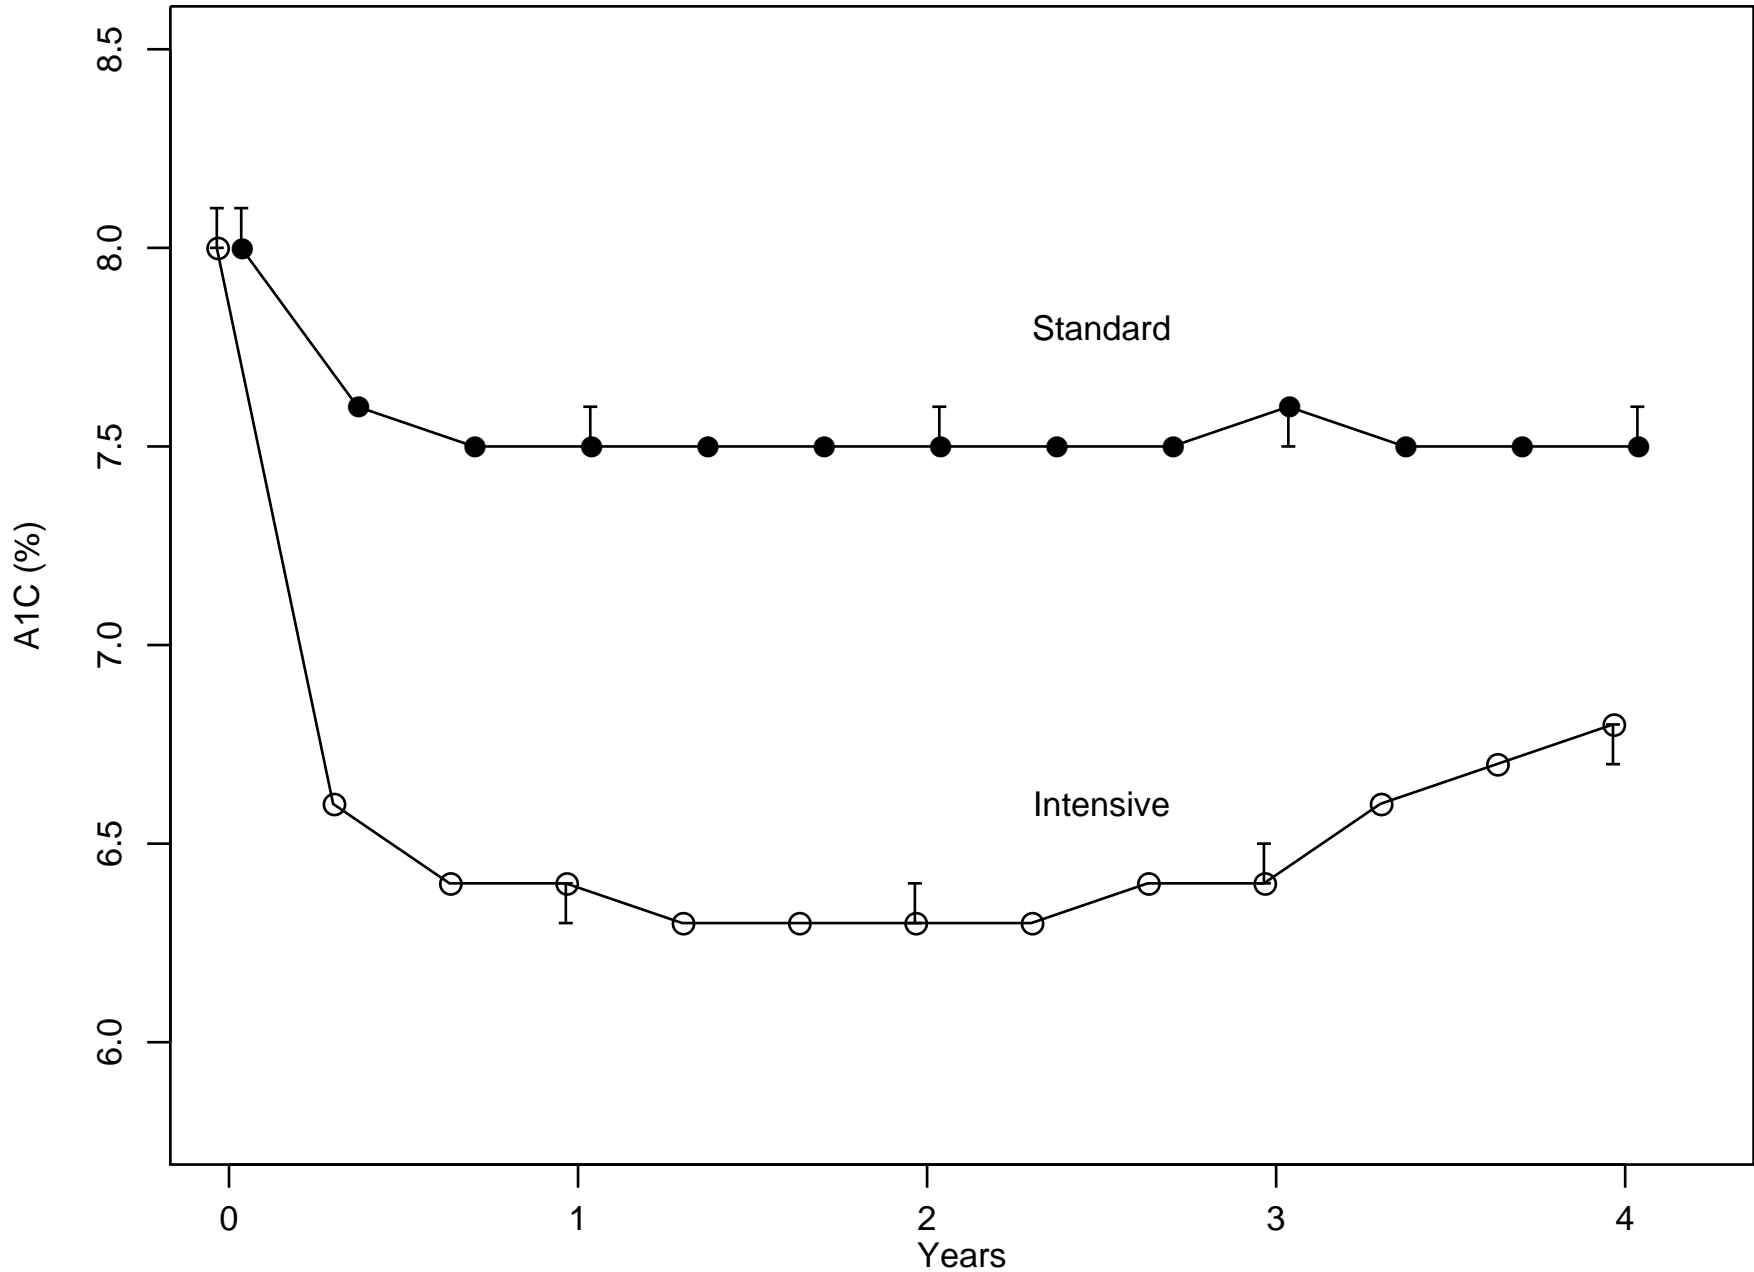

1426  
1427

1250  
1346

1227  
1323

1195  
1280

1001  
1016

Standard  
Intensive

# Median HDL and 95% CIs

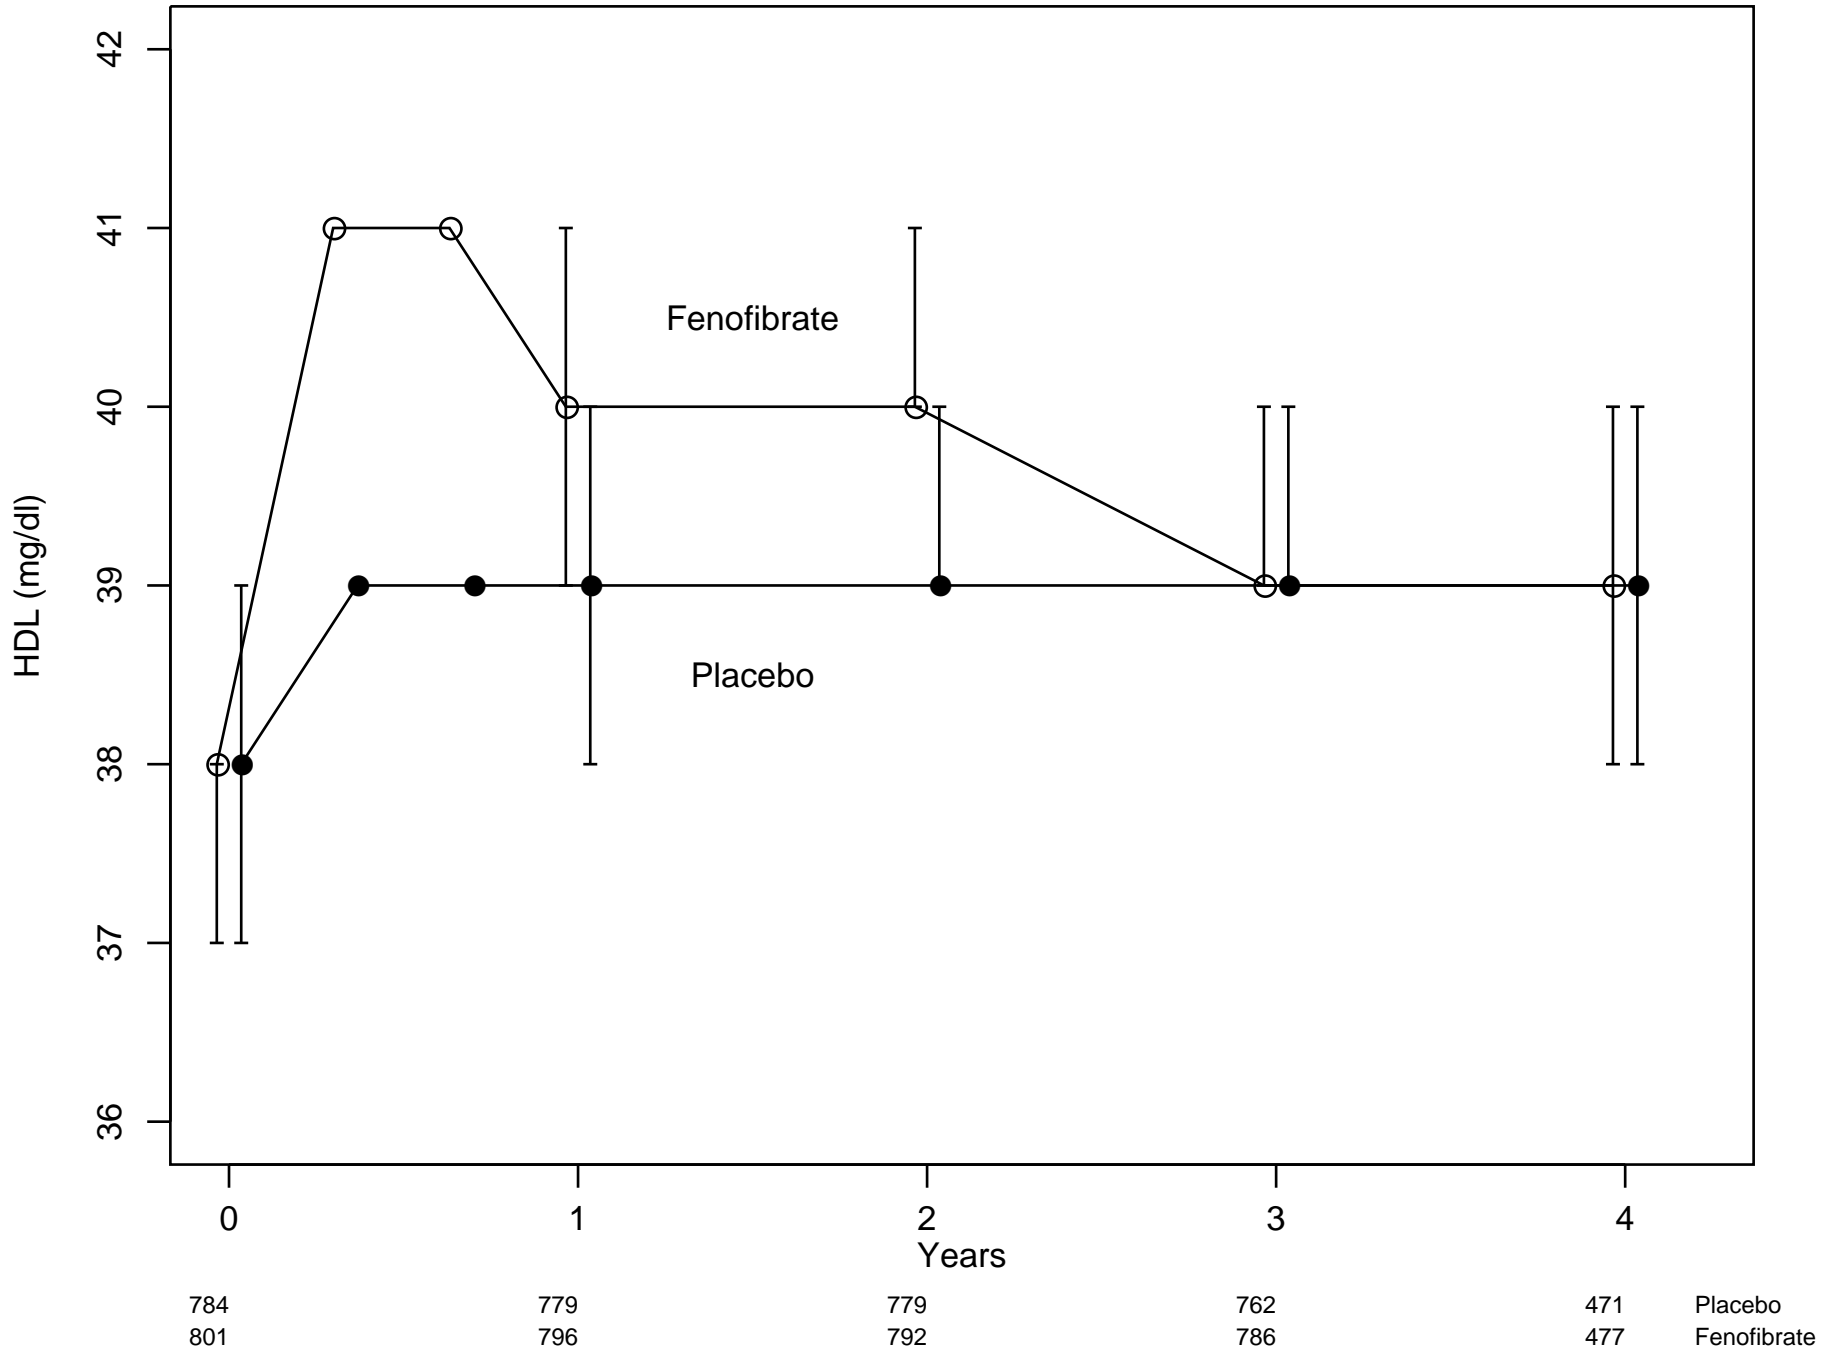

# Median Triglycerides and 95% CIs

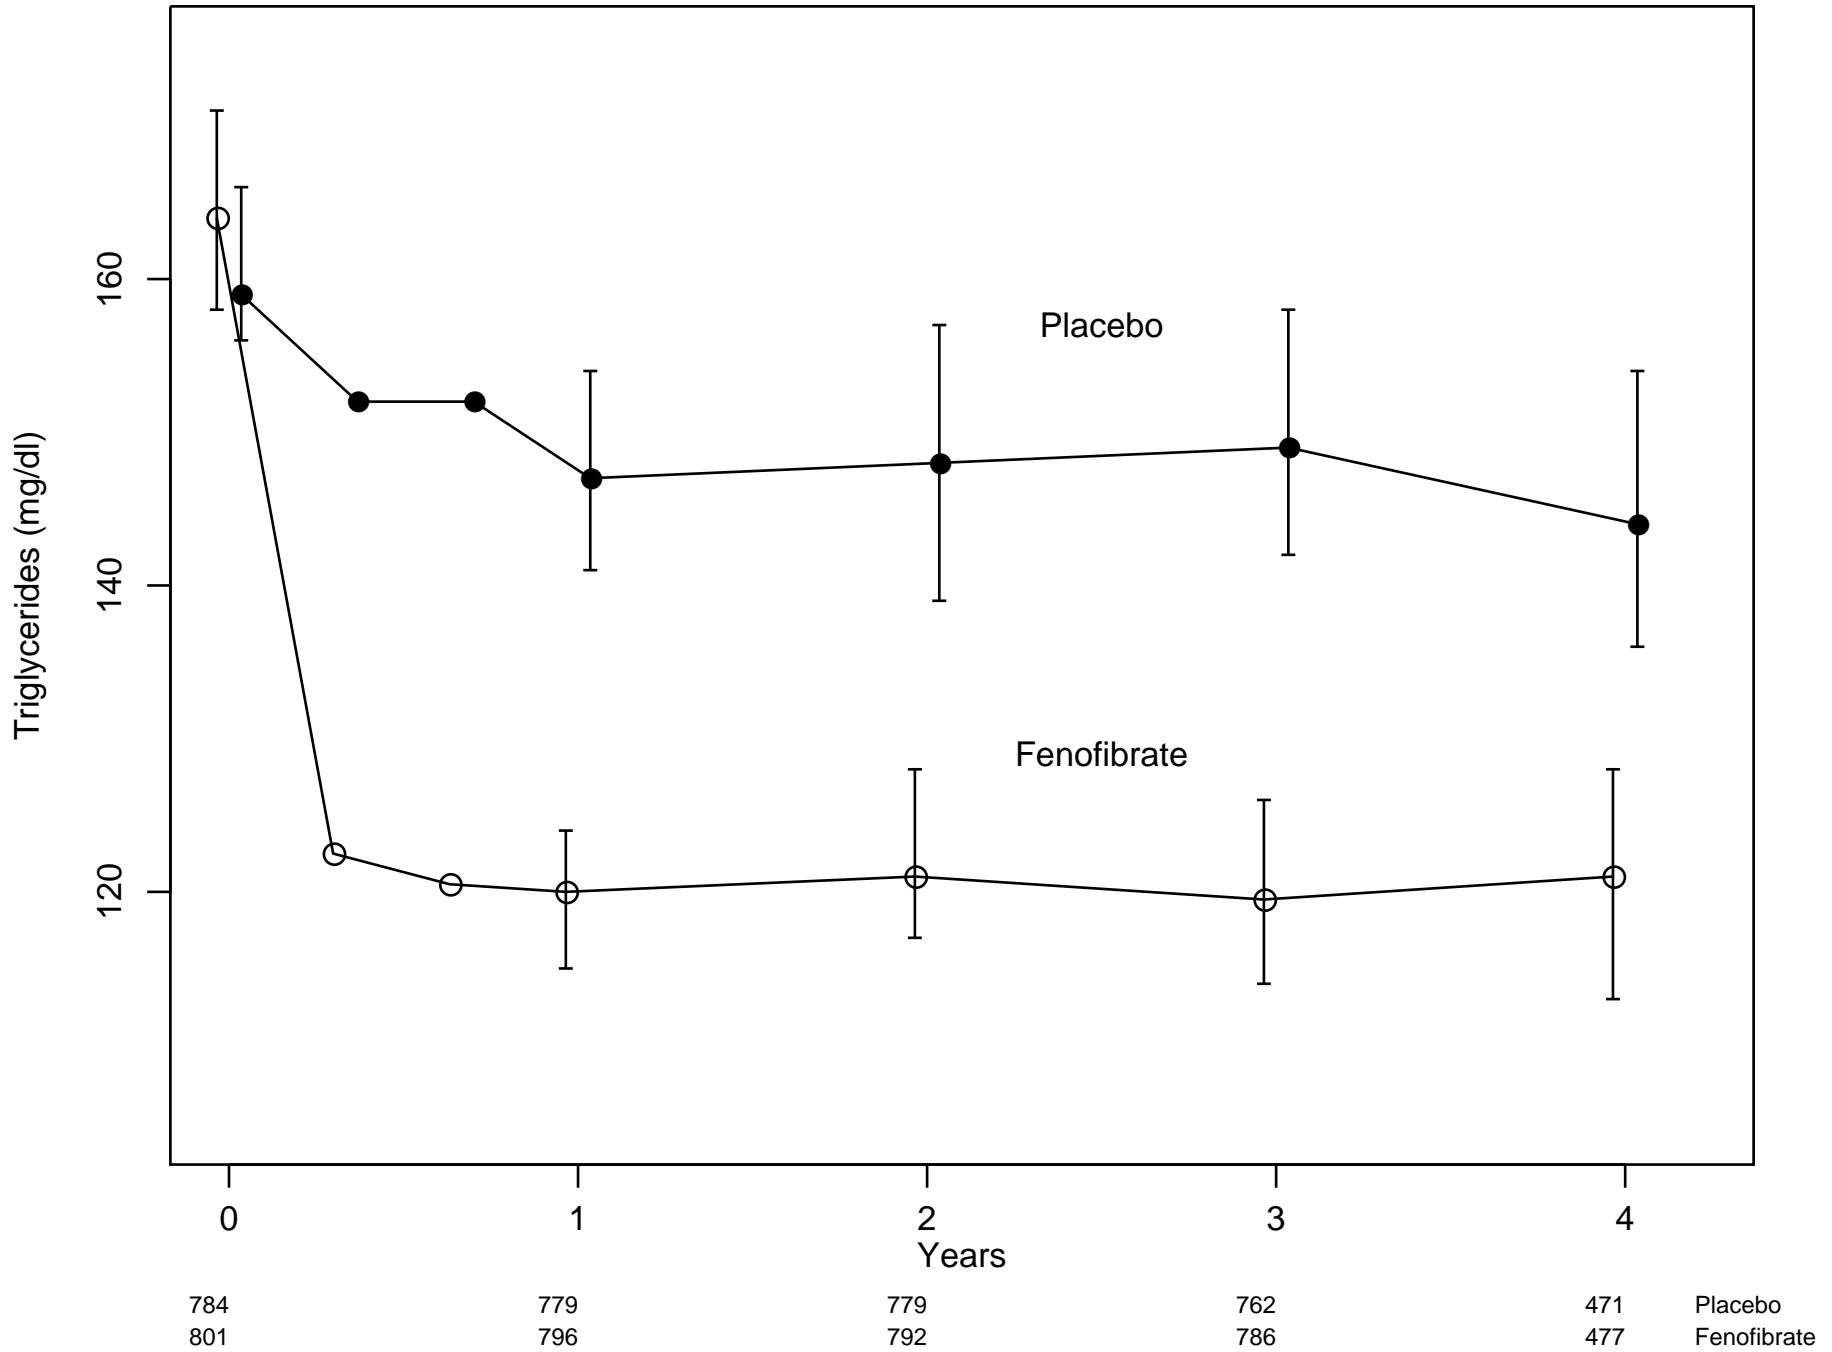

# Median SBP and 95% CIs

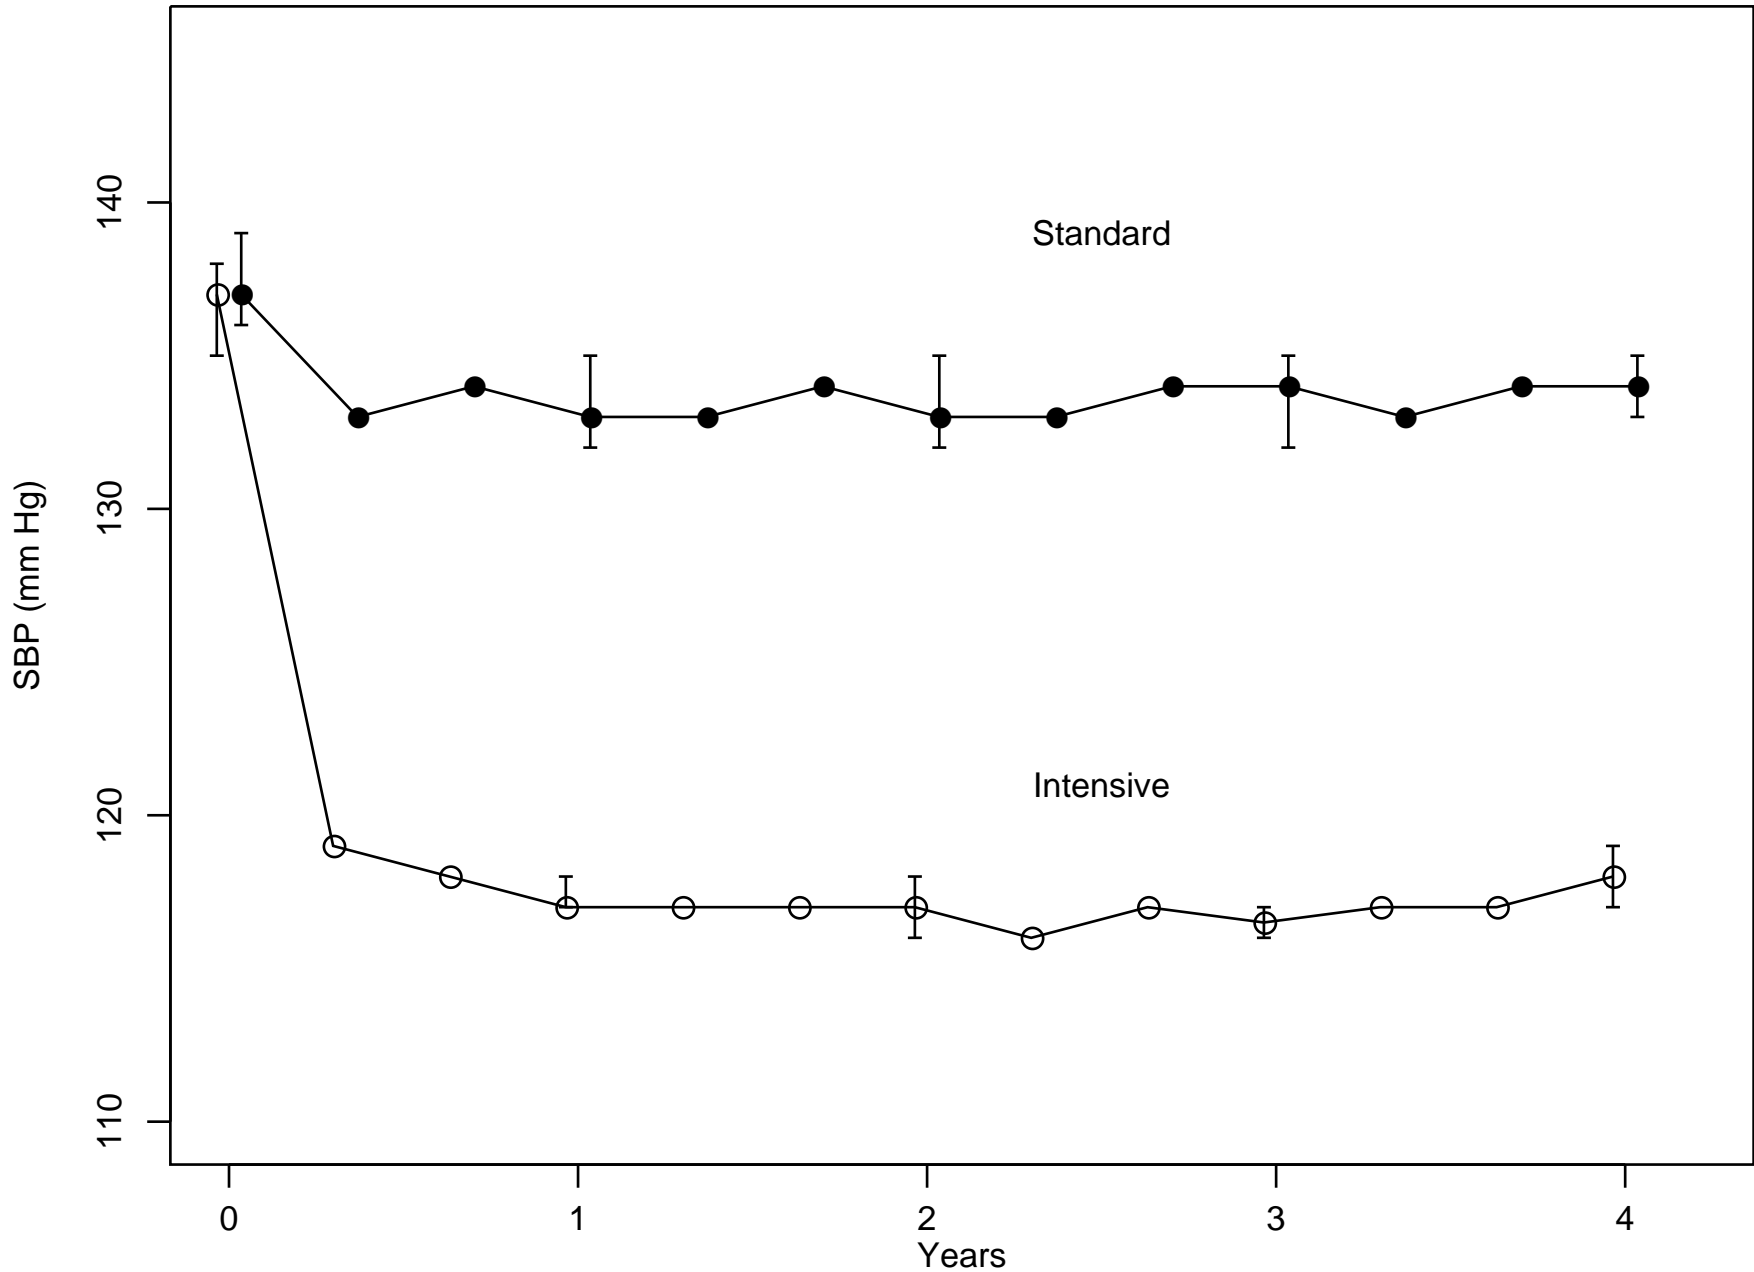

616  
647

600  
628

597  
617

598  
610

521  
553

Standard  
Intensive

## **Section 11. Subgroup Analyses (Forest Plots)**

Note: These plots are presented in Figures 1-3 of the paper. They are reproduced here in a larger format to allow greater clarity.

# Glycemia Subgroups

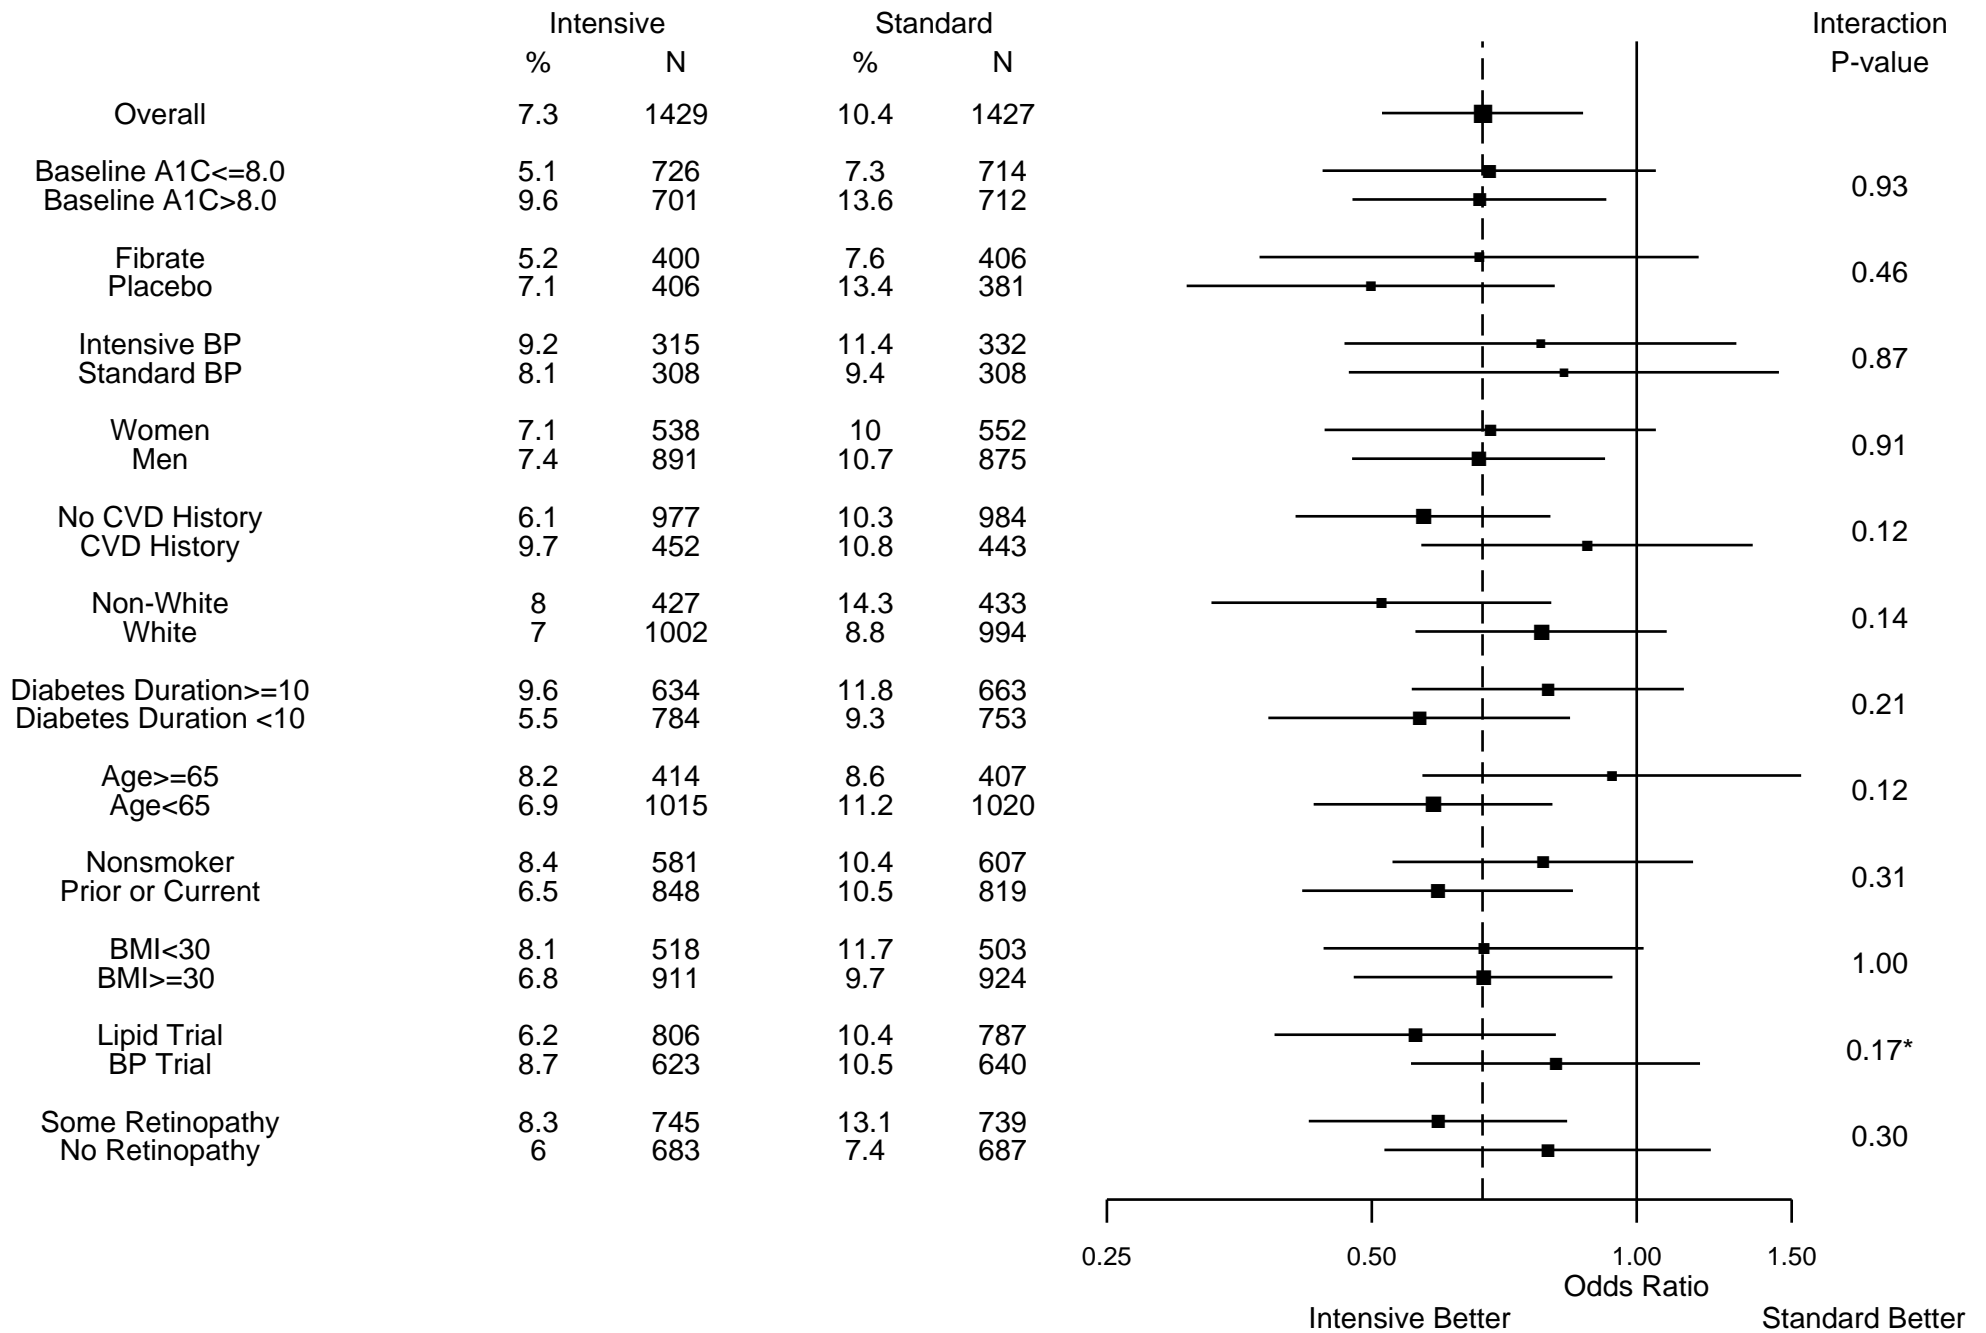

# Lipid Subgroups

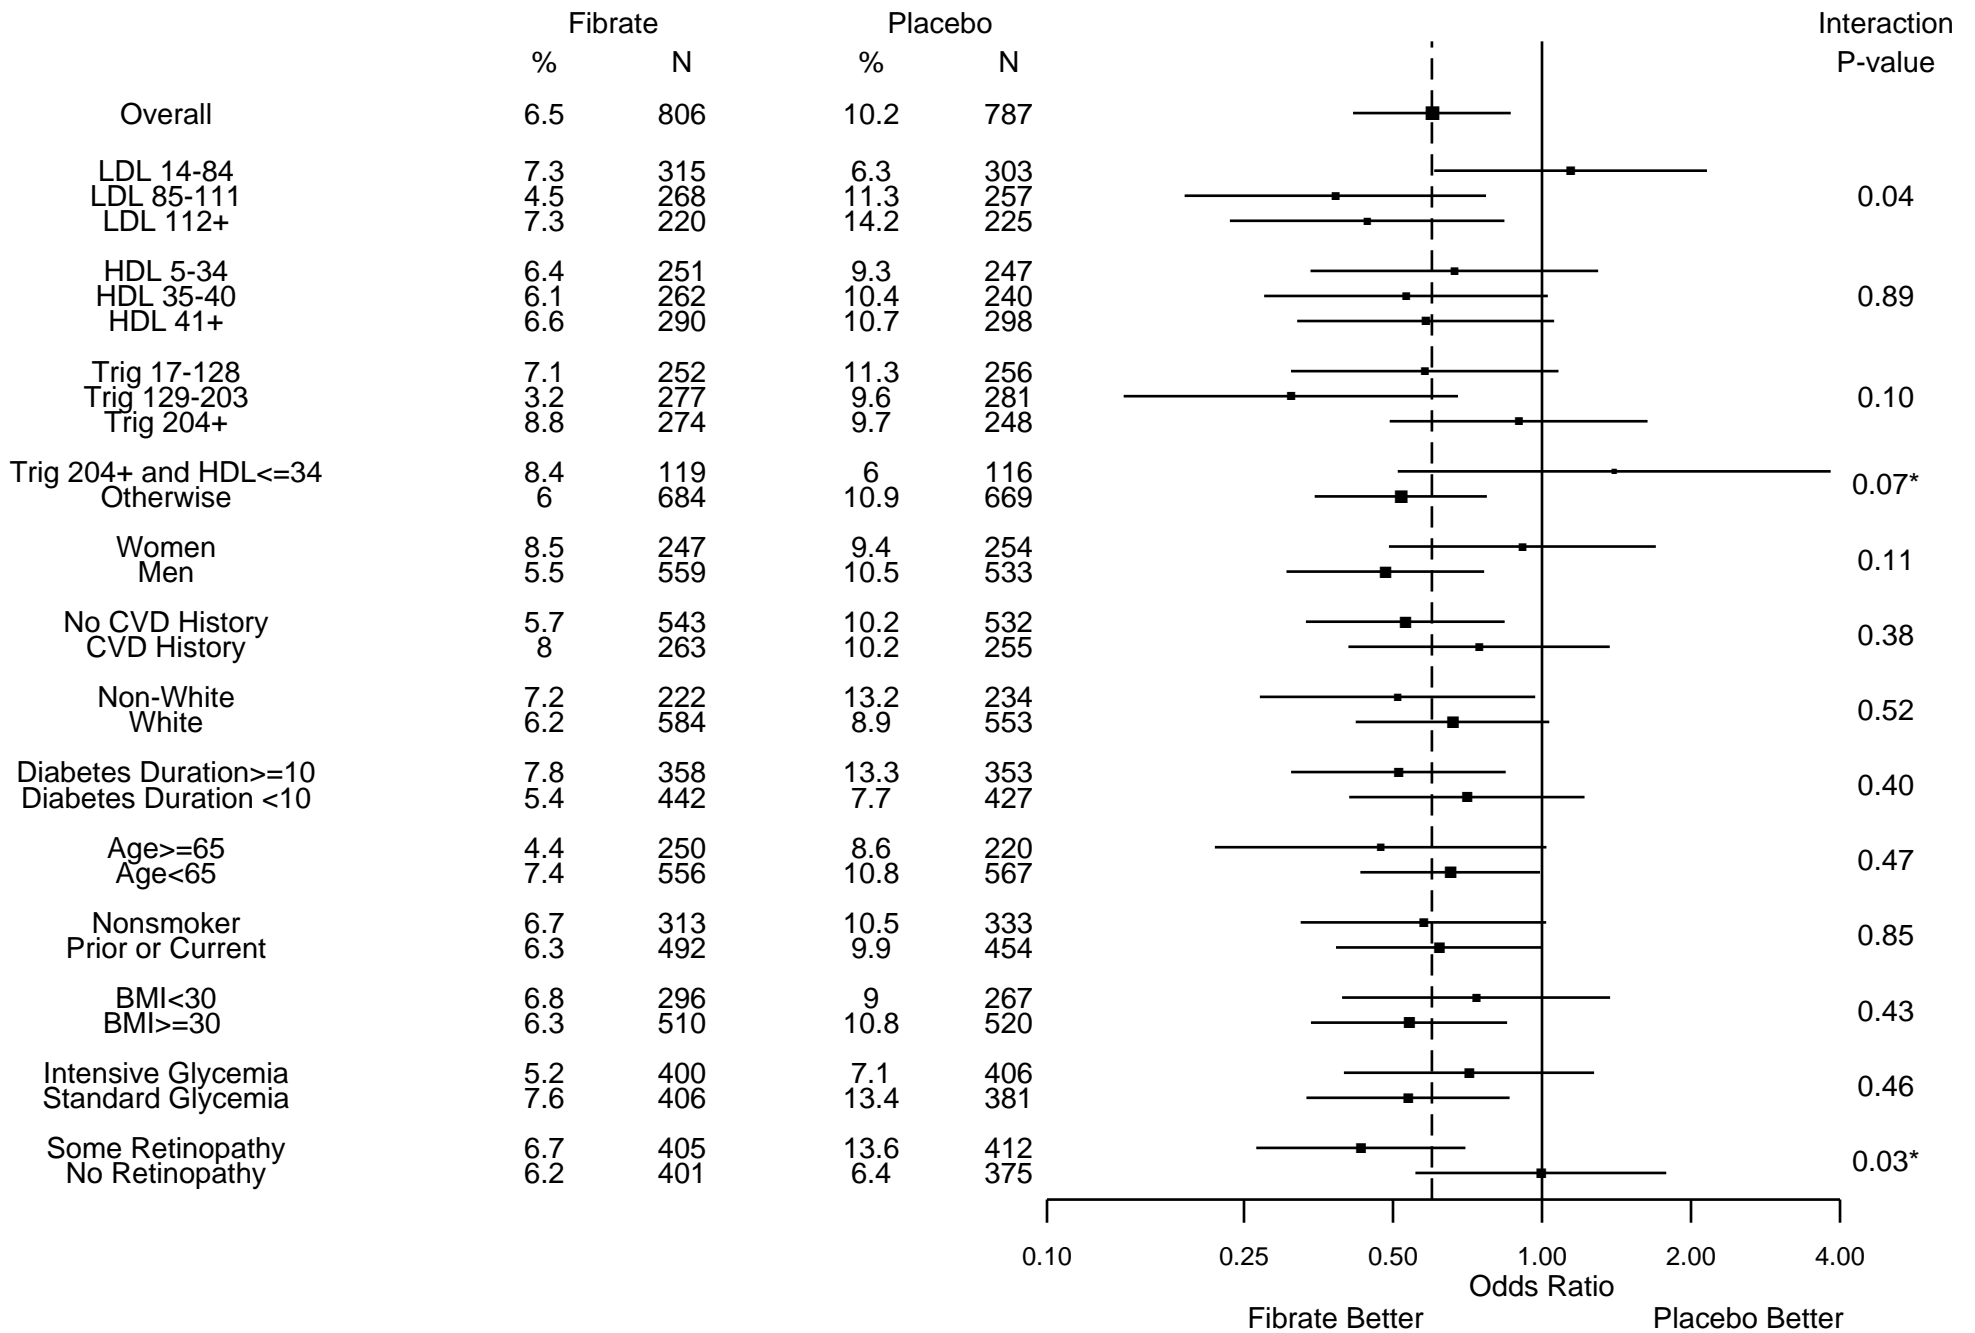



# Blood Pressure Subgroups

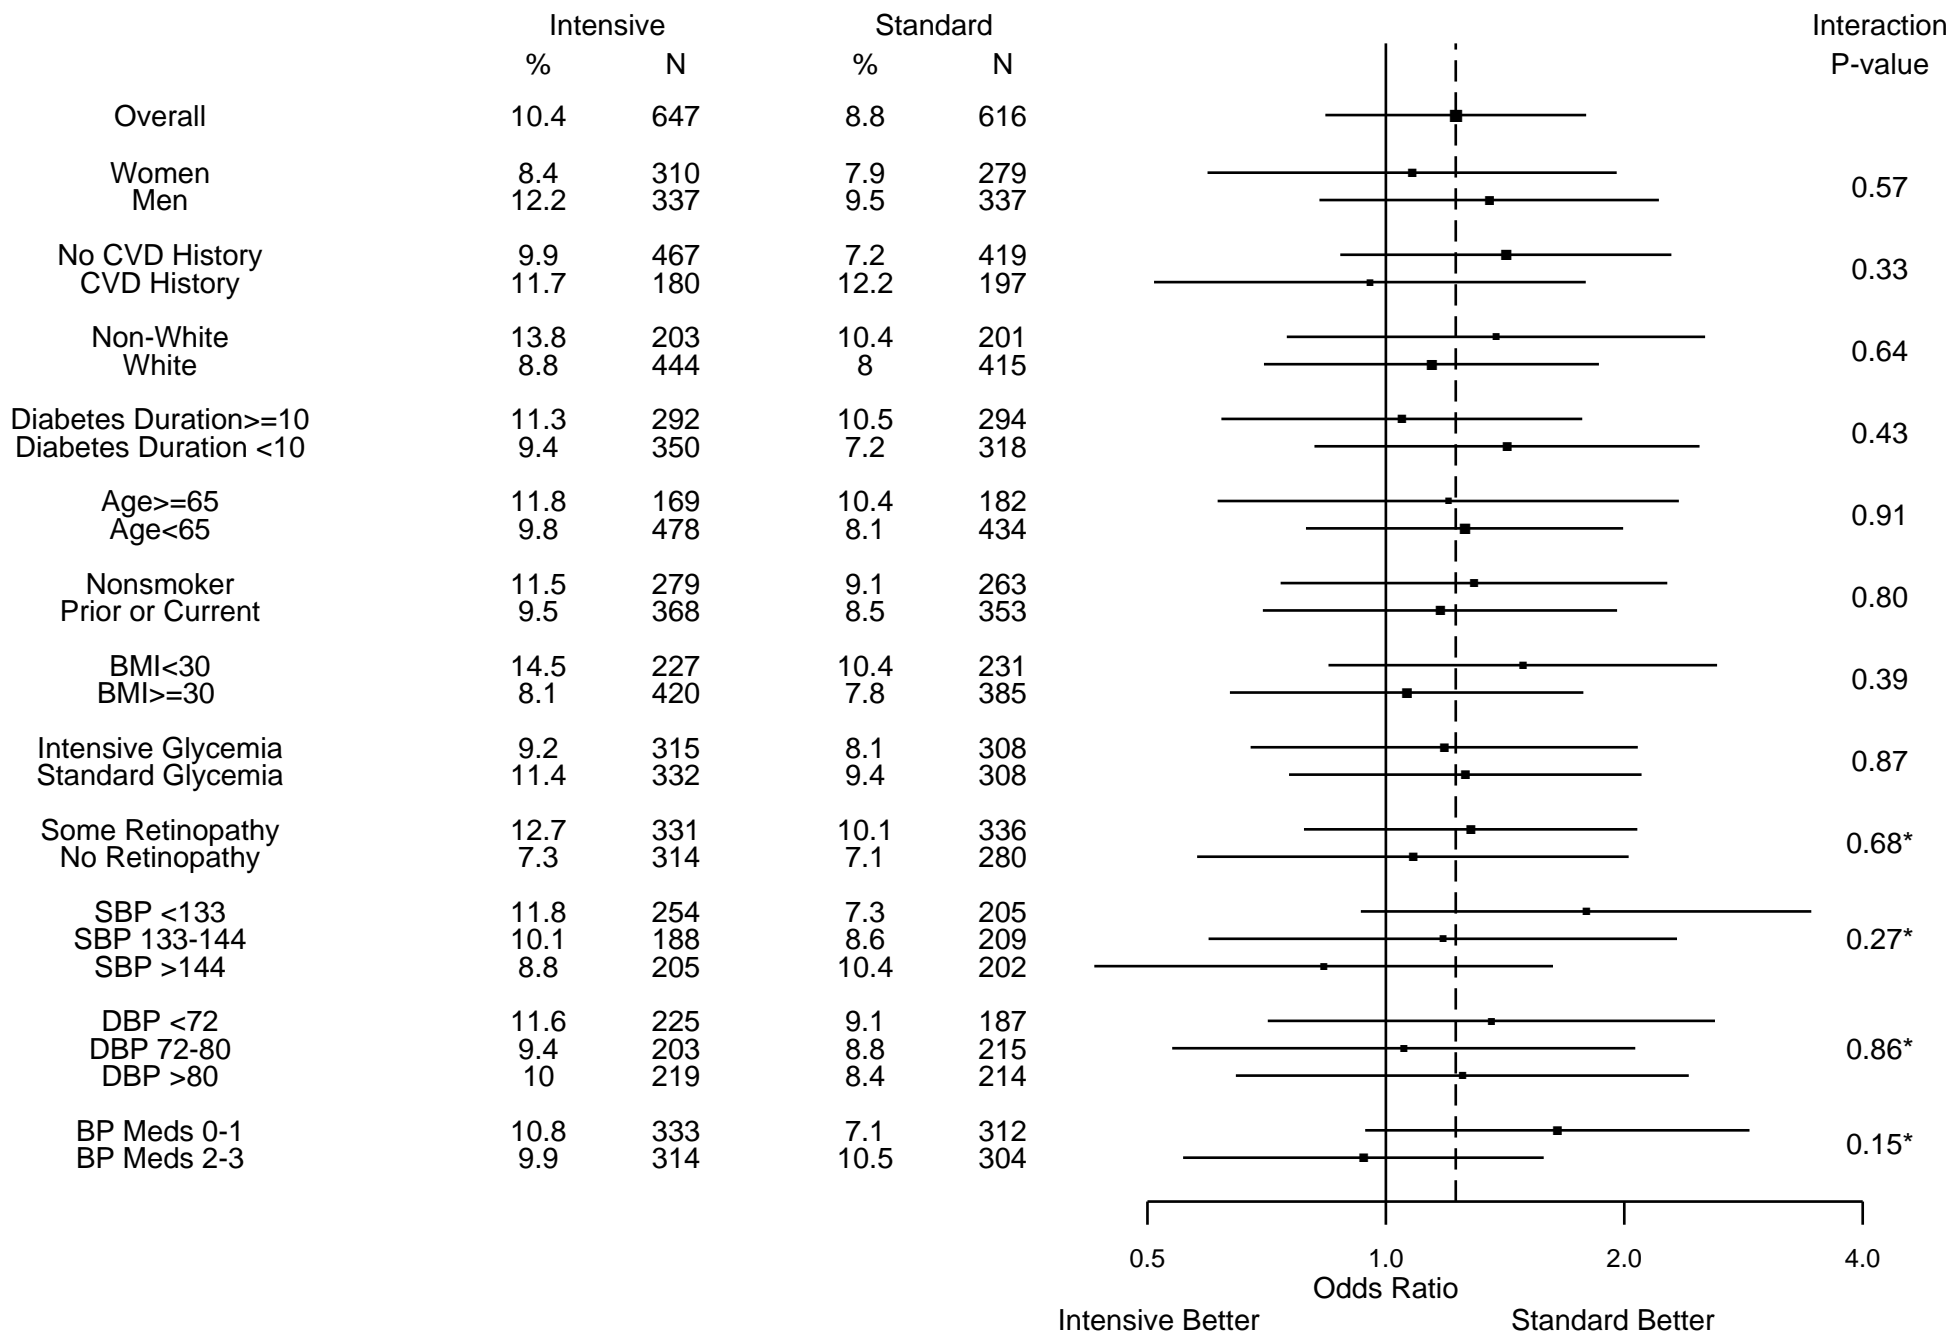

Supplement: NIHMS222645-supplement-Supplement1.pdf [file NIHMS222645-supplement-Supplement1.pdf]
